# Supplementary material for: Resolving ecological feedbacks on the ocean carbon sink in Earth system models
Source: Copernicus journal article supplement (doi:10.5194/esd-12-797-2021), 2021-07-14
Supplement: Supplementary file 1 [file esd-12-797-2021-supplement.zip]

Archive with 92 entries (81 files):
- ESD ecoGEnIE supp. material/
- ESD ecoGEnIE supp. material/cGEnIE.muffin files/
- ESD ecoGEnIE supp. material/cGEnIE.muffin files/base.config/
- ESD ecoGEnIE supp. material/cGEnIE.muffin files/base.config/McKay.muffin.CBE.worlg4.BASESFeTDTL.config
- ESD ecoGEnIE supp. material/cGEnIE.muffin files/base.config/McKay.muffin.CB.worlg4.BASESFeTDTL.config
- ESD ecoGEnIE supp. material/cGEnIE.muffin files/experiments/
- ESD ecoGEnIE supp. material/cGEnIE.muffin files/experiments/McKay.2020.BioFPR.default.SCEN.4p5
- ESD ecoGEnIE supp. material/cGEnIE.muffin files/experiments/McKay.2020.EcoTDR.recalib.SCEN.3PD
- ESD ecoGEnIE supp. material/cGEnIE.muffin files/experiments/McKay.2018.BioTDR.default.SCEN.8p5
- ESD ecoGEnIE supp. material/cGEnIE.muffin files/experiments/McKay.2018.EcoTDR.default.SCEN.8p5
- ESD ecoGEnIE supp. material/cGEnIE.muffin files/experiments/McKay.2020.BioTDR.recalib.SCEN.4p5
- ESD ecoGEnIE supp. material/cGEnIE.muffin files/experiments/McKay.2020.EcoFPR.recalib.SCEN.4p5
- ESD ecoGEnIE supp. material/cGEnIE.muffin files/experiments/McKay.2020.BioTDR.recalib.SCEN.8p5
- ESD ecoGEnIE supp. material/cGEnIE.muffin files/experiments/McKay.2020.BioFPR.default.SCEN.8p5
- ESD ecoGEnIE supp. material/cGEnIE.muffin files/experiments/McKay.2020.EcoFPR.recalib.SCEN.8p5
- ESD ecoGEnIE supp. material/cGEnIE.muffin files/experiments/McKay.2020.EcoFPR.recalib.SCEN.6p0
- ESD ecoGEnIE supp. material/cGEnIE.muffin files/experiments/McKay.2020.EcoTDR.recalib.SCEN.6p0
- ESD ecoGEnIE supp. material/cGEnIE.muffin files/experiments/McKay.2020.EcoTDR.recalib.SCEN.8p5
- ESD ecoGEnIE supp. material/cGEnIE.muffin files/experiments/McKay.2020.BioFPR.default.SCEN.3PD
- ESD ecoGEnIE supp. material/cGEnIE.muffin files/experiments/McKay.2018.EcoTDR.default.SCEN.4p5
- ESD ecoGEnIE supp. material/cGEnIE.muffin files/experiments/McKay.2020.BioFPR.default.SCEN.6p0
- ESD ecoGEnIE supp. material/cGEnIE.muffin files/experiments/McKay.2020.BioTDR.recalib.SCEN.3PD
- ESD ecoGEnIE supp. material/cGEnIE.muffin files/experiments/McKay.2020.EcoFPR.recalib.SCEN.3PD
- ESD ecoGEnIE supp. material/cGEnIE.muffin files/experiments/McKay.2018.BioTDR.default.SCEN.3PD
- ESD ecoGEnIE supp. material/cGEnIE.muffin files/experiments/McKay.2018.EcoTDR.default.SCEN.3PD
- ESD ecoGEnIE supp. material/cGEnIE.muffin files/experiments/McKay.2018.EcoTDR.default.SCEN.6p0
- ESD ecoGEnIE supp. material/cGEnIE.muffin files/experiments/McKay.2018.BioTDR.default.SCEN.4p5
- ESD ecoGEnIE supp. material/cGEnIE.muffin files/experiments/McKay.2018.EcoFPR.default.SCEN.8p5
- ESD ecoGEnIE supp. material/cGEnIE.muffin files/experiments/McKay.2018.EcoFPR.default.SCEN.6p0
- ESD ecoGEnIE supp. material/cGEnIE.muffin files/experiments/McKay.2020.BioTDR.recalib.SCEN.6p0
- ESD ecoGEnIE supp. material/cGEnIE.muffin files/experiments/McKay.2018.EcoFPR.default.SCEN.4p5
- ESD ecoGEnIE supp. material/cGEnIE.muffin files/experiments/McKay.2018.EcoFPR.default.SCEN.3PD
- ESD ecoGEnIE supp. material/cGEnIE.muffin files/experiments/McKay.2018.BioTDR.default.SCEN.6p0
- ESD ecoGEnIE supp. material/cGEnIE.muffin files/experiments/McKay.2020.EcoTDR.recalib.SCEN.4p5
- ESD ecoGEnIE supp. material/cGEnIE.muffin files/muffin_commands.txt
- ESD ecoGEnIE supp. material/cGEnIE.muffin files/forcings/
- ESD ecoGEnIE supp. material/cGEnIE.muffin files/forcings/worlg4.FpCO2_Fp13CO2.RCP8p5.FeMahowald2006/
- ESD ecoGEnIE supp. material/cGEnIE.muffin files/forcings/worlg4.FpCO2_Fp13CO2.RCP8p5.FeMahowald2006/biogem_force_flux_atm_pCO2_13C_sig.dat
- ESD ecoGEnIE supp. material/cGEnIE.muffin files/forcings/worlg4.FpCO2_Fp13CO2.RCP8p5.FeMahowald2006/configure_forcings_atm.dat
- ESD ecoGEnIE supp. material/cGEnIE.muffin files/forcings/worlg4.FpCO2_Fp13CO2.RCP8p5.FeMahowald2006/biogem_force_flux_sed_det_SUR.dat
- ESD ecoGEnIE supp. material/cGEnIE.muffin files/forcings/worlg4.FpCO2_Fp13CO2.RCP8p5.FeMahowald2006/biogem_force_flux_atm_pCO2_sig.dat
- ESD ecoGEnIE supp. material/cGEnIE.muffin files/forcings/worlg4.FpCO2_Fp13CO2.RCP8p5.FeMahowald2006/configure_forcings_ocn.dat
- ESD ecoGEnIE supp. material/cGEnIE.muffin files/forcings/worlg4.FpCO2_Fp13CO2.RCP8p5.FeMahowald2006/biogem_force_flux_sed_det_sig.dat
- ESD ecoGEnIE supp. material/cGEnIE.muffin files/forcings/worlg4.FpCO2_Fp13CO2.RCP8p5.FeMahowald2006/configure_forcings_sed.dat
- ESD ecoGEnIE supp. material/cGEnIE.muffin files/forcings/save_timeseries_historicalfuture.dat
- ESD ecoGEnIE supp. material/cGEnIE.muffin files/forcings/worlg4.RpCO2_Rp13CO2.FeMahowald2006/
- ESD ecoGEnIE supp. material/cGEnIE.muffin files/forcings/worlg4.RpCO2_Rp13CO2.FeMahowald2006/configure_forcings_atm.dat
- ESD ecoGEnIE supp. material/cGEnIE.muffin files/forcings/worlg4.RpCO2_Rp13CO2.FeMahowald2006/biogem_force_flux_sed_det_SUR.dat
- ESD ecoGEnIE supp. material/cGEnIE.muffin files/forcings/worlg4.RpCO2_Rp13CO2.FeMahowald2006/biogem_force_restore_atm_pCO2_sig.dat
- ESD ecoGEnIE supp. material/cGEnIE.muffin files/forcings/worlg4.RpCO2_Rp13CO2.FeMahowald2006/biogem_force_restore_atm_pCO2_13C_sig.dat
- ESD ecoGEnIE supp. material/cGEnIE.muffin files/forcings/worlg4.RpCO2_Rp13CO2.FeMahowald2006/configure_forcings_ocn.dat
- ESD ecoGEnIE supp. material/cGEnIE.muffin files/forcings/worlg4.RpCO2_Rp13CO2.FeMahowald2006/biogem_force_flux_sed_det_sig.dat
- ESD ecoGEnIE supp. material/cGEnIE.muffin files/forcings/worlg4.RpCO2_Rp13CO2.FeMahowald2006/configure_forcings_sed.dat
- ESD ecoGEnIE supp. material/cGEnIE.muffin files/forcings/worlg4.FpCO2_Fp13CO2.RCP4p5.FeMahowald2006/
- ESD ecoGEnIE supp. material/cGEnIE.muffin files/forcings/worlg4.FpCO2_Fp13CO2.RCP4p5.FeMahowald2006/biogem_force_flux_atm_pCO2_13C_sig.dat
- ESD ecoGEnIE supp. material/cGEnIE.muffin files/forcings/worlg4.FpCO2_Fp13CO2.RCP4p5.FeMahowald2006/configure_forcings_atm.dat
- ESD ecoGEnIE supp. material/cGEnIE.muffin files/forcings/worlg4.FpCO2_Fp13CO2.RCP4p5.FeMahowald2006/biogem_force_flux_sed_det_SUR.dat
- ESD ecoGEnIE supp. material/cGEnIE.muffin files/forcings/worlg4.FpCO2_Fp13CO2.RCP4p5.FeMahowald2006/biogem_force_flux_atm_pCO2_sig.dat
- ESD ecoGEnIE supp. material/cGEnIE.muffin files/forcings/worlg4.FpCO2_Fp13CO2.RCP4p5.FeMahowald2006/configure_forcings_ocn.dat
- ESD ecoGEnIE supp. material/cGEnIE.muffin files/forcings/worlg4.FpCO2_Fp13CO2.RCP4p5.FeMahowald2006/biogem_force_flux_sed_det_sig.dat
- ESD ecoGEnIE supp. material/cGEnIE.muffin files/forcings/worlg4.FpCO2_Fp13CO2.RCP4p5.FeMahowald2006/configure_forcings_sed.dat
- ESD ecoGEnIE supp. material/cGEnIE.muffin files/forcings/save_timeslice_historicalfuture_from0.dat
- ESD ecoGEnIE supp. material/cGEnIE.muffin files/forcings/worlg4.FpCO2_Fp13CO2.RCP6p0.FeMahowald2006/
- ESD ecoGEnIE supp. material/cGEnIE.muffin files/forcings/worlg4.FpCO2_Fp13CO2.RCP6p0.FeMahowald2006/biogem_force_flux_atm_pCO2_13C_sig.dat
- ESD ecoGEnIE supp. material/cGEnIE.muffin files/forcings/worlg4.FpCO2_Fp13CO2.RCP6p0.FeMahowald2006/configure_forcings_atm.dat
- ESD ecoGEnIE supp. material/cGEnIE.muffin files/forcings/worlg4.FpCO2_Fp13CO2.RCP6p0.FeMahowald2006/biogem_force_flux_sed_det_SUR.dat
- ESD ecoGEnIE supp. material/cGEnIE.muffin files/forcings/worlg4.FpCO2_Fp13CO2.RCP6p0.FeMahowald2006/biogem_force_flux_atm_pCO2_sig.dat
- ESD ecoGEnIE supp. material/cGEnIE.muffin files/forcings/worlg4.FpCO2_Fp13CO2.RCP6p0.FeMahowald2006/configure_forcings_ocn.dat
- ESD ecoGEnIE supp. material/cGEnIE.muffin files/forcings/worlg4.FpCO2_Fp13CO2.RCP6p0.FeMahowald2006/biogem_force_flux_sed_det_sig.dat
- ESD ecoGEnIE supp. material/cGEnIE.muffin files/forcings/worlg4.FpCO2_Fp13CO2.RCP6p0.FeMahowald2006/configure_forcings_sed.dat
- ESD ecoGEnIE supp. material/cGEnIE.muffin files/forcings/worlg4.FpCO2_Fp13CO2.RCP3PD.FeMahowald2006/
- ESD ecoGEnIE supp. material/cGEnIE.muffin files/forcings/worlg4.FpCO2_Fp13CO2.RCP3PD.FeMahowald2006/biogem_force_flux_atm_pCO2_13C_sig.dat
- ESD ecoGEnIE supp. material/cGEnIE.muffin files/forcings/worlg4.FpCO2_Fp13CO2.RCP3PD.FeMahowald2006/configure_forcings_atm.dat
- ESD ecoGEnIE supp. material/cGEnIE.muffin files/forcings/worlg4.FpCO2_Fp13CO2.RCP3PD.FeMahowald2006/biogem_force_flux_sed_det_SUR.dat
- ESD ecoGEnIE supp. material/cGEnIE.muffin files/forcings/worlg4.FpCO2_Fp13CO2.RCP3PD.FeMahowald2006/biogem_force_flux_atm_pCO2_sig.dat
- ESD ecoGEnIE supp. material/cGEnIE.muffin files/forcings/worlg4.FpCO2_Fp13CO2.RCP3PD.FeMahowald2006/configure_forcings_ocn.dat
- ESD ecoGEnIE supp. material/cGEnIE.muffin files/forcings/worlg4.FpCO2_Fp13CO2.RCP3PD.FeMahowald2006/biogem_force_flux_sed_det_sig.dat
- ESD ecoGEnIE supp. material/cGEnIE.muffin files/forcings/worlg4.FpCO2_Fp13CO2.RCP3PD.FeMahowald2006/configure_forcings_sed.dat
- ESD ecoGEnIE supp. material/cGEnIE.muffin files/spin-up restarts/
- ESD ecoGEnIE supp. material/cGEnIE.muffin files/spin-up restarts/McKay.2018.BioTDR.default.SPIN
- ESD ecoGEnIE supp. material/cGEnIE.muffin files/spin-up restarts/wardetal.2018.BIOGEM.SPIN
- ESD ecoGEnIE supp. material/cGEnIE.muffin files/spin-up restarts/McKay.2020.BioFPR.recalib.SPIN
- ESD ecoGEnIE supp. material/cGEnIE.muffin files/spin-up restarts/McKay.2018.BioFPR.default.SPIN
- ESD ecoGEnIE supp. material/cGEnIE.muffin files/spin-up restarts/McKay.2020.BioTDR.recalib.SPIN
- ESD ecoGEnIE supp. material/cGEnIE.muffin files/spin-up restarts/McKay.2020.EcoTDR.recalib.SPIN
- ESD ecoGEnIE supp. material/cGEnIE.muffin files/spin-up restarts/McKay.2020.EcoFPR.recalib.SPIN
- ESD ecoGEnIE supp. material/cGEnIE.muffin files/spin-up restarts/McKay.2018.EcoTDR.default.SPIN
- ESD ecoGEnIE supp. material/cGEnIE.muffin files/spin-up restarts/wardetal.2018.ECOGEM.SPIN
- ESD ecoGEnIE supp. material/cGEnIE.muffin files/spin-up restarts/McKay.2018.EcoFPR.default.SPIN
- ESD ecoGEnIE supp. material/cGEnIE.muffin files/spin-up restarts/wardetal.2018.BIOGEM_MLD.SPIN
- ESD ecoGEnIE supp. material/ESD - McKay et al 2020 - Proofs Update - Supplement.pdf
- esd-12-797-2021-supplement-title-page.pdf
