# Supplementary material for: Resolving ecological feedbacks on the ocean carbon sink in Earth system models
Source: Copernicus journal article supplement (doi:10.5194/esd-12-797-2021), 2021-07-14
Supplement: Supplementary file 1 [file esd-12-797-2021-supplement.zip › ESD ecoGEnIE supp. material/cGEnIE.muffin files/base.config/McKay.muffin.CBE.worlg4.BASESFeTDTL.config]

# *******************************************************************
# CONFIGURATION TEMPLATE (EMBM + GOLDSTEIN + GOLDSTEIN SEA-ICE + ATCHEM + BIOGEM + ECOGEM)
# *******************************************************************

# *******************************************************************
# GENIE COMPONENT SELECTION
# *******************************************************************
ma_flag_ebatmos=.TRUE.
ma_flag_goldsteinocean=.TRUE.
ma_flag_goldsteinseaice=.TRUE.
ma_flag_biogem=.TRUE.
ma_flag_atchem=.TRUE.
ma_flag_ecogem=.TRUE.
# *******************************************************************

# *******************************************************************
# GRID CONFIGURATION
# *******************************************************************
# Topography
ma_fname_topo='worlg4'
# Grid resolution of climate components
GENIENXOPTS='$(DEFINE)GENIENX=36'
GENIENYOPTS='$(DEFINE)GENIENY=36'
GENIENLOPTS='$(DEFINE)GENIENL=1'
GOLDSTEINNLONSOPTS='$(DEFINE)GOLDSTEINNLONS=36'
GOLDSTEINNLATSOPTS='$(DEFINE)GOLDSTEINNLATS=36'
GOLDSTEINNLEVSOPTS='$(DEFINE)GOLDSTEINNLEVS=16'
# Topography for climate components
ea_topo=worlg4
go_topo=worlg4
gs_topo=worlg4
# Wind forcing for climate components
ea_taux_u="worlg4.taux_u.interp"
ea_tauy_u="worlg4.tauy_u.interp"
ea_taux_v="worlg4.taux_v.interp"
ea_tauy_v="worlg4.tauy_v.interp"
ea_adv_u="worlg4.uncep.silo"
ea_adv_v="worlg4.vncep.silo"
bg_par_windspeed_file="trenberth_worlg4.k1_annualwindspeed.res"
# Assumed longitudinal offset of the grid
gm_par_grid_lon_offset=-260.0
# *******************************************************************

# *******************************************************************
# TRACER CONFIGURATION
# *******************************************************************
# Set number of tracers
GOLDSTEINNTRACSOPTS='$(DEFINE)GOLDSTEINNTRACS=17'
# Select tracers
gm_atm_select_3=.true.   #pCO2
gm_atm_select_4=.true.   #pco2_13
gm_atm_select_6=.true.   #pO2
gm_atm_select_16=.true.  #H2S
gm_ocn_select_3=.true.   #DIC
gm_ocn_select_4=.true.   #DIC13
gm_ocn_select_8=.true.   #PO4
gm_ocn_select_10=.true.  #O2
gm_ocn_select_12=.true.  #Alk
gm_ocn_select_15=.true.  #DOM_C
gm_ocn_select_16=.true.  #DOM_13C
gm_ocn_select_20=.true.  #DOM_P
gm_ocn_select_22=.true.  #DOM_Fe
gm_ocn_select_90=.true.  #TDFe
gm_ocn_select_42=.true.  #TL
gm_ocn_select_35=.true.  #Ca
gm_ocn_select_38=.true.  #SO4
gm_ocn_select_40=.true.  #H2S
gm_ocn_select_50=.true.  #Mg
gm_sed_select_3=.true.   #POC
gm_sed_select_4=.true.   #POC_13
gm_sed_select_8=.true.   #POP
gm_sed_select_10=.true.  #POFe
gm_sed_select_13=.true.  #POMFe
gm_sed_select_14=.true.  #CaCO3
gm_sed_select_15=.true.  #CaCO3_13
gm_sed_select_21=.true.  #CaCO3_Fe
gm_sed_select_22=.true.  #det
gm_sed_select_25=.true.  #det_Fe
gm_sed_select_32=.true.  #ash
gm_sed_select_33=.true.  #POC_frac2
gm_sed_select_34=.true.  #CaCO3_frac2
gm_sed_select_36=.true.  #CaCO3_age
# Set tracer initial values
ac_atm_init_3=278.0E-06  #pCO2
ac_atm_init_4=-6.5       #pCO2_13
ac_atm_init_6=0.2095     #pO2
bg_ocn_init_3=2.244E-03  #DIC
bg_ocn_init_4=0.4        #DIC13
bg_ocn_init_8=2.159E-06  #PO4
bg_ocn_init_10=1.696E-04 #O2
bg_ocn_init_12=2.363E-03 #ALK
bg_ocn_init_15=0.0       #DOM_C
bg_ocn_init_16=0.0       #DOM_13C
bg_ocn_init_20=0.0       #DOM_P
bg_ocn_init_22=0.0       #DOM_Fe
bg_ocn_init_90=0.650E-09 #TDFe
bg_ocn_init_42=1.000E-09 #TL
bg_ocn_init_35=1.025E-02 #Ca
bg_ocn_init_38=2.916E-02 #SO4
bg_ocn_init_40=0.0       #H2S
bg_ocn_init_50=5.282E-02 #Mg
# *******************************************************************

# *******************************************************************
# PHYSICAL CLIMATE CONFIGURATION #1: main goin parameters for worlg4
# *******************************************************************
# temp0
go_10=0.0
# temp1
go_11=0.0
# rel
go_12=0.9000000
# scl_tau / SclTau
go_13=1.2
# ocean diffusivites iso (or horiz) / OcnHorizDiff
go_14=1494.438354492187500000
# ocean diffusivites dia (or vert) / OcnVertDiff
go_15=0.000025363247914356
# inverse minimum drag in days / InvDrag
go_16=2.710164785385131800
# scl_tau (should be same as GOLDSTEIN's value) / SclTau
ea_11=1.2
# atm. diff. amp. for T / AtmDiffAmpT
ea_12=5204945.000000000000000000
# atm. diff. amp. for q / AtmDiffAmpQ
ea_13=1173269.250000000000000000
# dist'n width / AtmDiffWidthT
ea_14=1.410347938537597700
# dist'n slope / AtmDiffSlopeT
ea_15=0.090003050863742828
# atm. advection factor for T_z / AtmAdvectCoeffTm
ea_16=0.001037851092405617
# atm. advection factor for T_m / AtmAdvectCoeffQm
ea_17=0.0000000E+00
# atm. advection factor for q_z / AtmAdvectCoeffQz
ea_18=0.164652019739151000
# atm. advection factor for q_m / AtmAdvectCoeffQz
ea_19=0.164652019739151000
## extra1a
#ea_25=-2.1228021E-02
## extra1b
#ea_26=0.1202921
## extra1c
#ea_27=0.1273681
# SclFWF
ea_28=0.8
# sea-ice eddy diffusivity / SeaiceDiff
gs_11=3573.718017578125000000
#diffusivity scaling factor
ea_diffa_scl=0.25
#grid point distance over which scalar is applied (j direction)
ea_diffa_len=3
# *******************************************************************

# *******************************************************************
# MISC
# *******************************************************************
# kraus-turner mixed layer scheme on (1) or off (0)
go_imld = 1
# *******************************************************************

# *******************************************************************
# USER-APPENDED OPTIONS FOLLOW ...
# *******************************************************************
