# Supplementary material for: Resolving ecological feedbacks on the ocean carbon sink in Earth system models
Source: Copernicus journal article supplement (doi:10.5194/esd-12-797-2021), 2021-07-14
Supplement: Supplementary file 1 [file esd-12-797-2021-supplement.zip › ESD ecoGEnIE supp. material/cGEnIE.muffin files/experiments/McKay.2020.EcoTDR.recalib.SCEN.3PD]

#
#
# --- CLIMATE -------------------------------------------------------
#
# set climate feedback
ea_36=y
#
# --- BIOLOGICAL NEW PRODUCTION -------------------------------------
#
# biological scheme ID string
bg_par_bio_prodopt="NONE" 
#
# --- ORGANIC MATTER EXPORT RATIOS ----------------------------------
#
# production fraction of dissolved organic matter
bg_par_bio_red_DOMfrac=0.66
#
# --- INORGANIC MATTER EXPORT RATIOS --------------------------------
#
# underlying export CaCO3 as a proportion of particulate organic matter (i.e., CaCO3/POC)
bg_par_bio_red_POC_CaCO3=0.0485
# exponent for modifier of CaCO3:POC export ratio
bg_par_bio_red_POC_CaCO3_pP=0.7440
#
# --- REMINERALIZATION ----------------------------------------------
#
# DOC lifetime (yrs)
bg_par_bio_remin_DOMlifetime=1.0 
# initial fractional abundance of POC component #2
bg_par_bio_remin_POC_frac2=0.055 
# depth of remineralization or particulate organic matter
bg_par_bio_remin_POC_eL1=589.9451
# remineralization length #2 for POC
bg_par_bio_remin_POC_eL2=1000000.0
# initial fractional abundance of CaCO3 component #2
bg_par_bio_remin_CaCO3_frac2=0.45
# depth of remineralization or CaCO3
bg_par_bio_remin_CaCO3_eL1=1.8905e+003
# remineralization length #2 for CaCO3
bg_par_bio_remin_CaCO3_eL2=1000000.0
#
bg_ctrl_bio_remin_POC_fixed=.false.
bg_par_bio_remin_sinkingrate=125.0
bg_par_bio_remin_POC_K1=9.0E11
bg_par_bio_remin_POC_Ea1=55000.0
bg_par_bio_remin_POC_K2=1.0E14
bg_par_bio_remin_POC_Ea2=80000.0
bg_par_bio_remin_POC_frac2=0.008
#
# --- IRON ----------------------------------------------------------
#
bg_opt_geochem_Fe='hybrid'
# aeolian Fe solubility
bg_par_det_Fe_sol=0.002014275
#exponent for aeolian Fe solubility [use 1.0 for uniform solubility]
bg_par_det_Fe_sol_exp=0.500
# modifier of the scavenging rate of dissolved Fe
bg_par_scav_Fe_sf_POC=0.344104
bg_par_scav_Fe_sf_CaCO3=0.000
bg_par_scav_Fe_sf_opal=0.000
bg_par_scav_Fe_sf_det=0.000
# no scavenged regeneration
bg_par_scav_fremin=0.0
# return POFe
bg_ctrl_bio_NO_fsedFe=.false.
# Variable Fe:C
bg_ctrl_bio_red_fixedFetoC=.false.
# adjust pK'(FeL)
bg_par_K_FeL_pP=11.0
#(max) C/Fe organic matter ratio
bg_par_bio_red_POFe_POC=250000.0
#[FeT] dependent Fe:C ratio [Ridgwell, 2001] -- power
bg_par_bio_FetoC_pP=-0.4225
#[FeT] dependent Fe:C ratio [Ridgwell, 2001] -- scaling
bg_par_bio_FetoC_K=103684.0
#[FeT] dependent Fe:C ratio [Ridgwell, 2001] -- constant
bg_par_bio_FetoC_C=0.0
#
# --- ECOGEM ----------------------------------------------------------
#
gm_ctrl_debug_init          =0
eg_ctrl_debug_eco_init      =.false.

eg_par_ecogem_plankton_file ='8P8Z.eco' #specifies ecosystem config file

#################### Nitrogen ############################
eg_useNO3                   =.false. #turn on-able? test
eg_nquota                   =.false.
################## Phosphorus ############################
eg_usePO4                   =.true.
eg_pquota                   =.true.
######################## Iron ############################
eg_useFe                    =.true.
eg_fquota                   =.true.
################# Chlorophyll ############################
eg_chlquota                 =.true.
################# d13C ###################################
eg_useDIC_13C               =.true.

# Tuned
eg_qminP_a     =   3.33e-3
eg_qminFe_a    =   1.00e-6
eg_qmaxFe_a    =   4.00e-6

eg_ns          =   2 #prey-switching (1 disables, 2 enables)

eg_respir_a    = 0

eg_beta_mort_a =   0.8 # Maximum fraction to DOM as ESD --> zero
eg_beta_mort_b =   0.4 # Minimum fraction to DOM as ESD --> infinity 
eg_beta_mort_c = 100.0 # Size at 50:50 partition (default = 100 µm^3)
eg_beta_graz_a =   0.8 # Maximum fraction to DOM as ESD --> zero
eg_beta_graz_b =   0.4 # Minimum fraction to DOM as ESD --> infinity
eg_beta_graz_c = 100.0 # Size at 50:50 partition (default = 100 µm^3)

eg_par_bio_red_POC_CaCO3     = 0.0497 # underlying export CaCO3 as a proportion of particulate organic matter (i.e., CaCO3/POC)
eg_par_bio_red_POC_CaCO3_pP  = 0.7440 # exponent for modifier of CaCO3:POC export ratio
eg_par_bio_remin_POC_frac2   = 0.3235 #

eg_nsubtime                 =25
eg_n_keco                   =1

# disable ECOGEM restarts (as not currently coded up / used) - could be an issue for restarting from spin on historical_future scenario run
eg_ctrl_ncrst               =.false.
eg_ctrl_continuing          =.false.

#
# --- DATA SAVING -----------------------------------------------------
#
bg_par_data_save_level=10
bg_ctrl_debug_lvl0=.true.
ma_debug_loop=1
#save frequency
bg_par_infile_slice_name='save_timeslice_historicalfuture_from0.dat'
bg_par_infile_sig_name='save_timeseries_historicalfuture.dat'
#
# --- FORCINGS ------------------------------------------------------
#
# specify forcings
bg_par_forcing_name="worlg4.FpCO2_Fp13CO2.RCP3PD.FeMahowald2006"
bg_par_atm_force_scale_val_4=-27.0 
bg_par_atm_force_scale_val_3=8.3333e+013
#
# --- MISC ----------------------------------------------------------
#
# kraus-turner mixed layer scheme on (1) or off (0)
go_imld = 1
# change start year
#bg_par_misc_t_start=1700.0
#
# --- END -----------------------------------------------------------
#
#
