# Supplementary material for: Resolving ecological feedbacks on the ocean carbon sink in Earth system models
Source: Copernicus journal article supplement (doi:10.5194/esd-12-797-2021), 2021-07-14
Supplement: Supplementary file 1 [file esd-12-797-2021-supplement.zip › ESD ecoGEnIE supp. material/cGEnIE.muffin files/forcings/save_timeseries_historicalfuture.dat]

-START-OF-DATA-
0.5
1.5
2.5
3.5
4.5
5.5
6.5
7.5
8.5
9.5
10.5
20.5
30.5
40.5
50.5
60.5
70.5
80.5
90.5
100.5
200.5
300.5
400.5
500.5
600.5
700.5
800.5
900.5
1000.5
1700.5
1701.5
1702.5
1703.5
1704.5
1705.5
1706.5
1707.5
1708.5
1709.5
1710.5
1711.5
1712.5
1713.5
1714.5
1715.5
1716.5
1717.5
1718.5
1719.5
1720.5
1721.5
1722.5
1723.5
1724.5
1725.5
1726.5
1727.5
1728.5
1729.5
1730.5
1731.5
1732.5
1733.5
1734.5
1735.5
1736.5
1737.5
1738.5
1739.5
1740.5
1741.5
1742.5
1743.5
1744.5
1745.5
1746.5
1747.5
1748.5
1749.5
1750.5
1751.5
1752.5
1753.5
1754.5
1755.5
1756.5
1757.5
1758.5
1759.5
1760.5
1761.5
1762.5
1763.5
1764.5
1765.5
1766.5
1767.5
1768.5
1769.5
1770.5
1771.5
1772.5
1773.5
1774.5
1775.5
1776.5
1777.5
1778.5
1779.5
1780.5
1781.5
1782.5
1783.5
1784.5
1785.5
1786.5
1787.5
1788.5
1789.5
1790.5
1791.5
1792.5
1793.5
1794.5
1795.5
1796.5
1797.5
1798.5
1799.5
1800.5
1801.5
1802.5
1803.5
1804.5
1805.5
1806.5
1807.5
1808.5
1809.5
1810.5
1811.5
1812.5
1813.5
1814.5
1815.5
1816.5
1817.5
1818.5
1819.5
1820.5
1821.5
1822.5
1823.5
1824.5
1825.5
1826.5
1827.5
1828.5
1829.5
1830.5
1831.5
1832.5
1833.5
1834.5
1835.5
1836.5
1837.5
1838.5
1839.5
1840.5
1841.5
1842.5
1843.5
1844.5
1845.5
1846.5
1847.5
1848.5
1849.5
1850.5
1851.5
1852.5
1853.5
1854.5
1855.5
1856.5
1857.5
1858.5
1859.5
1860.5
1861.5
1862.5
1863.5
1864.5
1865.5
1866.5
1867.5
1868.5
1869.5
1870.5
1871.5
1872.5
1873.5
1874.5
1875.5
1876.5
1877.5
1878.5
1879.5
1880.5
1881.5
1882.5
1883.5
1884.5
1885.5
1886.5
1887.5
1888.5
1889.5
1890.5
1891.5
1892.5
1893.5
1894.5
1895.5
1896.5
1897.5
1898.5
1899.5
1900.5
1901.5
1902.5
1903.5
1904.5
1905.5
1906.5
1907.5
1908.5
1909.5
1910.5
1911.5
1912.5
1913.5
1914.5
1915.5
1916.5
1917.5
1918.5
1919.5
1920.5
1921.5
1922.5
1923.5
1924.5
1925.5
1926.5
1927.5
1928.5
1929.5
1930.5
1931.5
1932.5
1933.5
1934.5
1935.5
1936.5
1937.5
1938.5
1939.5
1940.5
1941.5
1942.5
1943.5
1944.5
1945.5
1946.5
1947.5
1948.5
1949.5
1950.5
1951.5
1952.5
1953.5
1954.5
1955.5
1956.5
1957.5
1958.5
1959.5
1960.5
1961.5
1962.5
1963.5
1964.5
1965.5
1966.5
1967.5
1968.5
1969.5
1970.5
1971.5
1972.5
1973.5
1974.5
1975.5
1976.5
1977.5
1978.5
1979.5
1980.5
1981.5
1982.5
1983.5
1984.5
1985.5
1986.5
1987.5
1988.5
1989.5
1990.5
1991.5
1992.5
1993.5
1994.5
1995.5
1996.5
1997.5
1998.5
1999.5
2000.5
2001.5
2002.5
2003.5
2004.5
2005.5
2006.5
2007.5
2008.5
2009.5
2010.5
2011.5
2012.5
2013.5
2014.5
2015.5
2016.5
2017.5
2018.5
2019.5
2020.5
2021.5
2022.5
2023.5
2024.5
2025.5
2026.5
2027.5
2028.5
2029.5
2030.5
2031.5
2032.5
2033.5
2034.5
2035.5
2036.5
2037.5
2038.5
2039.5
2040.5
2041.5
2042.5
2043.5
2044.5
2045.5
2046.5
2047.5
2048.5
2049.5
2050.5
2051.5
2052.5
2053.5
2054.5
2055.5
2056.5
2057.5
2058.5
2059.5
2060.5
2061.5
2062.5
2063.5
2064.5
2065.5
2066.5
2067.5
2068.5
2069.5
2070.5
2071.5
2072.5
2073.5
2074.5
2075.5
2076.5
2077.5
2078.5
2079.5
2080.5
2081.5
2082.5
2083.5
2084.5
2085.5
2086.5
2087.5
2088.5
2089.5
2090.5
2091.5
2092.5
2093.5
2094.5
2095.5
2096.5
2097.5
2098.5
2099.5
2100.5
2101.5
2102.5
2103.5
2104.5
2105.5
2106.5
2107.5
2108.5
2109.5
2110.5
2111.5
2112.5
2113.5
2114.5
2115.5
2116.5
2117.5
2118.5
2119.5
2120.5
2121.5
2122.5
2123.5
2124.5
2125.5
2126.5
2127.5
2128.5
2129.5
2130.5
2131.5
2132.5
2133.5
2134.5
2135.5
2136.5
2137.5
2138.5
2139.5
2140.5
2141.5
2142.5
2143.5
2144.5
2145.5
2146.5
2147.5
2148.5
2149.5
2150.5
2151.5
2152.5
2153.5
2154.5
2155.5
2156.5
2157.5
2158.5
2159.5
2160.5
2161.5
2162.5
2163.5
2164.5
2165.5
2166.5
2167.5
2168.5
2169.5
2170.5
2171.5
2172.5
2173.5
2174.5
2175.5
2176.5
2177.5
2178.5
2179.5
2180.5
2181.5
2182.5
2183.5
2184.5
2185.5
2186.5
2187.5
2188.5
2189.5
2190.5
2191.5
2192.5
2193.5
2194.5
2195.5
2196.5
2197.5
2198.5
2199.5
2200.5
2201.5
2202.5
2203.5
2204.5
2205.5
2206.5
2207.5
2208.5
2209.5
2210.5
2211.5
2212.5
2213.5
2214.5
2215.5
2216.5
2217.5
2218.5
2219.5
2220.5
2221.5
2222.5
2223.5
2224.5
2225.5
2226.5
2227.5
2228.5
2229.5
2230.5
2231.5
2232.5
2233.5
2234.5
2235.5
2236.5
2237.5
2238.5
2239.5
2240.5
2241.5
2242.5
2243.5
2244.5
2245.5
2246.5
2247.5
2248.5
2249.5
2250.5
2251.5
2252.5
2253.5
2254.5
2255.5
2256.5
2257.5
2258.5
2259.5
2260.5
2261.5
2262.5
2263.5
2264.5
2265.5
2266.5
2267.5
2268.5
2269.5
2270.5
2271.5
2272.5
2273.5
2274.5
2275.5
2276.5
2277.5
2278.5
2279.5
2280.5
2281.5
2282.5
2283.5
2284.5
2285.5
2286.5
2287.5
2288.5
2289.5
2290.5
2291.5
2292.5
2293.5
2294.5
2295.5
2296.5
2297.5
2298.5
2299.5
2300.5
2301.5
2302.5
2303.5
2304.5
2305.5
2306.5
2307.5
2308.5
2309.5
2310.5
2311.5
2312.5
2313.5
2314.5
2315.5
2316.5
2317.5
2318.5
2319.5
2320.5
2321.5
2322.5
2323.5
2324.5
2325.5
2326.5
2327.5
2328.5
2329.5
2330.5
2331.5
2332.5
2333.5
2334.5
2335.5
2336.5
2337.5
2338.5
2339.5
2340.5
2341.5
2342.5
2343.5
2344.5
2345.5
2346.5
2347.5
2348.5
2349.5
2350.5
2351.5
2352.5
2353.5
2354.5
2355.5
2356.5
2357.5
2358.5
2359.5
2360.5
2361.5
2362.5
2363.5
2364.5
2365.5
2366.5
2367.5
2368.5
2369.5
2370.5
2371.5
2372.5
2373.5
2374.5
2375.5
2376.5
2377.5
2378.5
2379.5
2380.5
2381.5
2382.5
2383.5
2384.5
2385.5
2386.5
2387.5
2388.5
2389.5
2390.5
2391.5
2392.5
2393.5
2394.5
2395.5
2396.5
2397.5
2398.5
2399.5
2400.5
2401.5
2402.5
2403.5
2404.5
2405.5
2406.5
2407.5
2408.5
2409.5
2410.5
2411.5
2412.5
2413.5
2414.5
2415.5
2416.5
2417.5
2418.5
2419.5
2420.5
2421.5
2422.5
2423.5
2424.5
2425.5
2426.5
2427.5
2428.5
2429.5
2430.5
2431.5
2432.5
2433.5
2434.5
2435.5
2436.5
2437.5
2438.5
2439.5
2440.5
2441.5
2442.5
2443.5
2444.5
2445.5
2446.5
2447.5
2448.5
2449.5
2450.5
2451.5
2452.5
2453.5
2454.5
2455.5
2456.5
2457.5
2458.5
2459.5
2460.5
2461.5
2462.5
2463.5
2464.5
2465.5
2466.5
2467.5
2468.5
2469.5
2470.5
2471.5
2472.5
2473.5
2474.5
2475.5
2476.5
2477.5
2478.5
2479.5
2480.5
2481.5
2482.5
2483.5
2484.5
2485.5
2486.5
2487.5
2488.5
2489.5
2490.5
2491.5
2492.5
2493.5
2494.5
2495.5
2496.5
2497.5
2498.5
2499.5
2599.5
2799.5
2999.5
3199.5
3399.5
3599.5
3799.5
3999.5
4199.5
4399.5
4599.5
4799.5
4999.5
5499.5
5999.5
6499.5
6999.5
7499.5
7999.5
8499.5
8999.5
9499.5
9999.5
10999.5
11999.5
12999.5
13999.5
14999.5
15999.5
16999.5
17999.5
18999.5
19999.5
21999.5
23999.5
25999.5
27999.5
29999.5
31999.5
33999.5
35999.5
37999.5
39999.5
41999.5
43999.5
45999.5
47999.5
49999.5
54999.5
59999.5
64999.5
69999.5
74999.5
79999.5
84999.5
89999.5
94999.5
99999.5
109999.5
119999.5
129999.5
139999.5
149999.5
159999.5
169999.5
179999.5
189999.5
199999.5
219999.5
239999.5
259999.5
279999.5
299999.5
319999.5
339999.5
359999.5
379999.5
399999.5
419999.5
439999.5
459999.5
479999.5
499999.5
549999.5
599999.5
649999.5
699999.5
749999.5
799999.5
849999.5
899999.5
949999.5
999999.5
1099999.5
1199999.5
1299999.5
1399999.5
1499999.5
1599999.5
1699999.5
1799999.5
1899999.5
1999999.5
2199999.5
2399999.5
2599999.5
2799999.5
2999999.5
3199999.5
3399999.5
3599999.5
3799999.5
3999999.5
4199999.5
4399999.5
4599999.5
4799999.5
4999999.5
5499999.5
5999999.5
6499999.5
6999999.5
7499999.5
7999999.5
8499999.5
8999999.5
9499999.5
9999999.5
-END-OF-DATA-
