# Supplementary material for: Resolving ecological feedbacks on the ocean carbon sink in Earth system models
Source: Copernicus journal article supplement (doi:10.5194/esd-12-797-2021), 2021-07-14
Supplement: Supplementary file 1 [file esd-12-797-2021-supplement.zip › ESD ecoGEnIE supp. material/cGEnIE.muffin files/forcings/save_timeslice_historicalfuture_from0.dat]

-START-OF-DATA-
0.5
1.5
4.5
9.5
19.5
49.5
99.5
199.5
499.5
999.5
1499.5
1765.5
1976.5
1990.5
1994.5
2000.5
2004.5
2009.5
2019.5
2049.5
2099.5
2199.5
2299.5
2399.5
2499.5
2999.5
3999.5
4999.5
9999.5
19999.5
49999.5
99999.5
199999.5
499999.5
999999.5
1999999.5
4999999.5
9999999.5
19999999.5
49999999.5
99999999.5
-END-OF-DATA-
