# Supplementary material for: Resolving ecological feedbacks on the ocean carbon sink in Earth system models
Source: Copernicus journal article supplement (doi:10.5194/esd-12-797-2021), 2021-07-14
Supplement: Supplementary file 1 [file esd-12-797-2021-supplement.zip › ESD ecoGEnIE supp. material/cGEnIE.muffin files/forcings/worlg4.FpCO2_Fp13CO2.RCP3PD.FeMahowald2006/biogem_force_flux_atm_pCO2_sig.dat]

-START-OF-DATA-
000000.0 0.0
1764.0 0.0
1765.0	0.003
1766.0	0.008338296
1767.0	0.013676593
1768.0	0.019014889
1769.0	0.024353185
1770.0	0.029691482
1771.0	0.036029778
1772.0	0.041368074
1773.0	0.046706371
1774.0	0.052044667
1775.0	0.057382963
1776.0	0.062721259
1777.0	0.068059556
1778.0	0.073397852
1779.0	0.078736148
1780.0	0.084074445
1781.0	0.090412741
1782.0	0.095751037
1783.0	0.101089334
1784.0	0.10642763
1785.0	0.11176593
1786.0	0.11710422
1787.0	0.12244252
1788.0	0.12778082
1789.0	0.13311911
1790.0	0.13845741
1791.0	0.1447957
1792.0	0.150134
1793.0	0.1554723
1794.0	0.16081059
1795.0	0.16614889
1796.0	0.17148719
1797.0	0.17782548
1798.0	0.18316378
1799.0	0.18850207
1800.0	0.19484037
1801.0	0.20017867
1802.0	0.20751696
1803.0	0.21185526
1804.0	0.21719356
1805.0	0.22253185
1806.0	0.22887015
1807.0	0.23420845
1808.0	0.23954674
1809.0	0.24488504
1810.0	0.25022333
1811.0	0.25656163
1812.0	0.26189993
1813.0	0.26723822
1814.0	0.27257652
1815.0	0.27891482
1816.0	0.28525311
1817.0	0.29159141
1818.0	0.2969297
1819.0	0.302268
1820.0	0.3076063
1821.0	0.31294459
1822.0	0.31928289
1823.0	0.32562119
1824.0	0.33095948
1825.0	0.33729778
1826.0	0.34263608
1827.0	0.34897437
1828.0	0.35431267
1829.0	0.35965096
1830.0	0.37098926
1831.0	0.37532756
1832.0	0.38066585
1833.0	0.38700415
1834.0	0.39234245
1835.0	0.39868074
1836.0	0.40801904
1837.0	0.41335733
1838.0	0.41969563
1839.0	0.42603393
1840.0	0.433372219
1841.0	0.439710519
1842.0	0.447048819
1843.0	0.453387109
1844.0	0.460725409
1845.0	0.470063709
1846.0	0.475401999
1847.0	0.483740299
1848.0	0.490078589
1849.0	0.498416889
1850.0	0.507755189
1851.0	0.500785689
1852.0	0.555622819
1853.0	0.556354489
1854.0	0.564817079
1855.0	0.564679249
1856.0	0.574934879
1857.0	0.581231999
1858.0	0.587232979
1859.0	0.597253889
1860.0	0.609966889
1861.0	0.623223598
1862.0	0.570716628
1863.0	0.57774912
1864.0	0.58613825
1865.0	0.59379536
1866.0	0.59691218
1867.0	0.60360622
1868.0	0.6072347
1869.0	0.61276645
1870.0	0.6166445
1871.0	0.64366524
1872.0	0.7403334
1873.0	0.76129965
1874.0	0.75771154
1875.0	0.77842647
1876.0	0.78787801
1877.0	0.79713853
1878.0	0.8050507
1879.0	0.82534752
1880.0	0.85724317
1881.0	0.89187292
1882.0	0.86066403
1883.0	0.88051762
1884.0	0.88712775
1885.0	0.8922361
1886.0	0.89814412
1887.0	0.91116314
1888.0	0.94173355
1889.0	0.94020019
1890.0	0.96775411
1891.0	0.98224854
1892.0	0.99719118
1893.0	0.9944033
1894.0	1.02336718
1895.0	1.0504185
1896.0	1.06527839
1897.0	1.08956411
1898.0	1.11600097
1899.0	1.15920445
1900.0	1.18720627
1901.0	1.25494317
1902.0	1.26897363
1903.0	1.34367095
1904.0	1.37229323
1905.0	1.4328152
1906.0	1.50353383
1907.0	1.58776273
1908.0	1.56141277
1909.0	1.60237806
1910.0	1.64098168
1911.0	1.61489404
1912.0	1.62684843
1913.0	1.66597976
1914.0	1.56479151
1915.0	1.54374963
1916.0	1.60911647
1917.0	1.66619629
1918.0	1.65030426
1919.0	1.52565434
1920.0	1.65328337
1921.0	1.5604166
1922.0	1.59294089
1923.0	1.72328818
1924.0	1.71986058
1925.0	1.73308854
1926.0	1.74448326
1927.0	1.85918283
1928.0	1.86467141
1929.0	1.96922601
1930.0	1.94887975
1931.0	1.84334081
1932.0	1.65922596
1933.0	1.70158848
1934.0	1.76986255
1935.0	1.82171575
1936.0	1.93129993
1937.0	1.98869902
1938.0	1.92388222
1939.0	1.97144376
1940.0	2.06583237
1941.0	2.08436458
1942.0	2.1110497
1943.0	2.1547656
1944.0	2.15139864
1945.0	1.92914739
1946.0	2.08014892
1947.0	2.26217994
1948.0	2.34413044
1949.0	2.30112641
1950.0	2.52233465
1951.0	2.8565201
1952.0	2.9056378
1953.0	2.9455171
1954.0	3.0171416
1955.0	3.2341855
1956.0	3.4226883
1957.0	3.5418718
1958.0	3.6495817
1959.0	3.6655957
1960.0	3.7692833
1961.0	3.8383218
1962.0	3.9355717
1963.0	4.0922947
1964.0	4.2595879
1965.0	4.4092558
1966.0	4.5986968
1967.0	4.7086254
1968.0	4.8232028
1969.0	5.0383879
1970.0	5.2731129
1971.0	5.3018913
1972.0	5.4460621
1973.0	5.6680986
1974.0	5.6827371
1975.0	5.6465876
1976.0	5.9736077
1977.0	6.1229874
1978.0	6.19537
1979.0	6.4517127
1980.0	6.3572096
1981.0	6.2128621
1982.0	6.3174055
1983.0	6.3355201
1984.0	6.5500833
1985.0	6.7193449
1986.0	6.8972023
1987.0	7.0470086
1988.0	7.2807248
1989.0	7.4126436
1990.0	7.4634833
1991.0	7.6159799
1992.0	7.4215304
1993.0	7.4221006
1994.0	7.5315956
1995.0	7.6470104
1996.0	7.7611025
1997.0	7.8371397
1998.0	7.8028431
1999.0	7.7517892
2000.0	7.8838
2001.0	8.0279
2002.0	8.1807
2003.0	8.5117
2004.0	8.9148
2005.0	9.1665
2006.0	9.3103
2007.0	9.4536
2008.0	9.5950334
2009.0	9.7364666
2010.0	9.8779
2011.0	9.91616
2012.0	9.95442
2013.0	9.99268
2014.0	10.03094
2015.0	10.0692
2016.0	10.10746
2017.0	10.14572
2018.0	10.18398
2019.0	10.22224
2020.0	10.2605
2021.0	10.02903
2022.0	9.79756
2023.0	9.56609
2024.0	9.33462
2025.0	9.10315
2026.0	8.87168
2027.0	8.64021
2028.0	8.40874
2029.0	8.17727
2030.0	7.9458
2031.0	7.65361
2032.0	7.36142
2033.0	7.06923
2034.0	6.77704
2035.0	6.48485
2036.0	6.19266
2037.0	5.90047
2038.0	5.60828
2039.0	5.31609
2040.0	5.0239
2041.0	4.86019
2042.0	4.69648
2043.0	4.53277
2044.0	4.36906
2045.0	4.20535
2046.0	4.04164
2047.0	3.87793
2048.0	3.71422
2049.0	3.55051
2050.0	3.3868
2051.0	3.25156
2052.0	3.11632
2053.0	2.98108
2054.0	2.84584
2055.0	2.7106
2056.0	2.57536
2057.0	2.44012
2058.0	2.30488
2059.0	2.16964
2060.0	2.0344
2061.0	1.89635
2062.0	1.7583
2063.0	1.62025
2064.0	1.4822
2065.0	1.34415
2066.0	1.2061
2067.0	1.06805
2068.0	0.93
2069.0	0.79195
2070.0	0.6539
2071.0	0.60021
2072.0	0.54652
2073.0	0.49283
2074.0	0.43914
2075.0	0.38545
2076.0	0.33176
2077.0	0.27807
2078.0	0.22438
2079.0	0.17069
2080.0	0.117
2081.0	0.0785
2082.0	0.04
2083.0	0.0015
2084.0	-0.037
2085.0	-0.0755
2086.0	-0.114
2087.0	-0.1525
2088.0	-0.191
2089.0	-0.2295
2090.0	-0.268
2091.0	-0.28315
2092.0	-0.2983
2093.0	-0.31345
2094.0	-0.3286
2095.0	-0.34375
2096.0	-0.3589
2097.0	-0.37405
2098.0	-0.3892
2099.0	-0.40435
2100.0	-0.4195
2101.0	-0.439952
2102.0	-0.460404
2103.0	-0.480856
2104.0	-0.501308
2105.0	-0.52176
2106.0	-0.542212
2107.0	-0.562664
2108.0	-0.583116
2109.0	-0.603568
2110.0	-0.62402
2111.0	-0.644472
2112.0	-0.664924
2113.0	-0.685376
2114.0	-0.705828
2115.0	-0.72628
2116.0	-0.746732
2117.0	-0.767184
2118.0	-0.787636
2119.0	-0.808088
2120.0	-0.82854
2121.0	-0.848992
2122.0	-0.869444
2123.0	-0.889896
2124.0	-0.910348
2125.0	-0.9308
2126.0	-0.9308
2127.0	-0.9308
2128.0	-0.9308
2129.0	-0.9308
2130.0	-0.9308
2131.0	-0.9308
2132.0	-0.9308
2133.0	-0.9308
2134.0	-0.9308
2135.0	-0.9308
2136.0	-0.9308
2137.0	-0.9308
2138.0	-0.9308
2139.0	-0.9308
2140.0	-0.9308
2141.0	-0.9308
2142.0	-0.9308
2143.0	-0.9308
2144.0	-0.9308
2145.0	-0.9308
2146.0	-0.9308
2147.0	-0.9308
2148.0	-0.9308
2149.0	-0.9308
2150.0	-0.9308
2151.0	-0.9308
2152.0	-0.9308
2153.0	-0.9308
2154.0	-0.9308
2155.0	-0.9308
2156.0	-0.9308
2157.0	-0.9308
2158.0	-0.9308
2159.0	-0.9308
2160.0	-0.9308
2161.0	-0.9308
2162.0	-0.9308
2163.0	-0.9308
2164.0	-0.9308
2165.0	-0.9308
2166.0	-0.9308
2167.0	-0.9308
2168.0	-0.9308
2169.0	-0.9308
2170.0	-0.9308
2171.0	-0.9308
2172.0	-0.9308
2173.0	-0.9308
2174.0	-0.9308
2175.0	-0.9308
2176.0	-0.9308
2177.0	-0.9308
2178.0	-0.9308
2179.0	-0.9308
2180.0	-0.9308
2181.0	-0.9308
2182.0	-0.9308
2183.0	-0.9308
2184.0	-0.9308
2185.0	-0.9308
2186.0	-0.9308
2187.0	-0.9308
2188.0	-0.9308
2189.0	-0.9308
2190.0	-0.9308
2191.0	-0.9308
2192.0	-0.9308
2193.0	-0.9308
2194.0	-0.9308
2195.0	-0.9308
2196.0	-0.9308
2197.0	-0.9308
2198.0	-0.9308
2199.0	-0.9308
2200.0	-0.9308
2201.0	-0.9308
2202.0	-0.9308
2203.0	-0.9308
2204.0	-0.9308
2205.0	-0.9308
2206.0	-0.9308
2207.0	-0.9308
2208.0	-0.9308
2209.0	-0.9308
2210.0	-0.9308
2211.0	-0.9308
2212.0	-0.9308
2213.0	-0.9308
2214.0	-0.9308
2215.0	-0.9308
2216.0	-0.9308
2217.0	-0.9308
2218.0	-0.9308
2219.0	-0.9308
2220.0	-0.9308
2221.0	-0.9308
2222.0	-0.9308
2223.0	-0.9308
2224.0	-0.9308
2225.0	-0.9308
2226.0	-0.9308
2227.0	-0.9308
2228.0	-0.9308
2229.0	-0.9308
2230.0	-0.9308
2231.0	-0.9308
2232.0	-0.9308
2233.0	-0.9308
2234.0	-0.9308
2235.0	-0.9308
2236.0	-0.9308
2237.0	-0.9308
2238.0	-0.9308
2239.0	-0.9308
2240.0	-0.9308
2241.0	-0.9308
2242.0	-0.9308
2243.0	-0.9308
2244.0	-0.9308
2245.0	-0.9308
2246.0	-0.9308
2247.0	-0.9308
2248.0	-0.9308
2249.0	-0.9308
2250.0	-0.9308
2251.0	-0.9308
2252.0	-0.9308
2253.0	-0.9308
2254.0	-0.9308
2255.0	-0.9308
2256.0	-0.9308
2257.0	-0.9308
2258.0	-0.9308
2259.0	-0.9308
2260.0	-0.9308
2261.0	-0.9308
2262.0	-0.9308
2263.0	-0.9308
2264.0	-0.9308
2265.0	-0.9308
2266.0	-0.9308
2267.0	-0.9308
2268.0	-0.9308
2269.0	-0.9308
2270.0	-0.9308
2271.0	-0.9308
2272.0	-0.9308
2273.0	-0.9308
2274.0	-0.9308
2275.0	-0.9308
2276.0	-0.9308
2277.0	-0.9308
2278.0	-0.9308
2279.0	-0.9308
2280.0	-0.9308
2281.0	-0.9308
2282.0	-0.9308
2283.0	-0.9308
2284.0	-0.9308
2285.0	-0.9308
2286.0	-0.9308
2287.0	-0.9308
2288.0	-0.9308
2289.0	-0.9308
2290.0	-0.9308
2291.0	-0.9308
2292.0	-0.9308
2293.0	-0.9308
2294.0	-0.9308
2295.0	-0.9308
2296.0	-0.9308
2297.0	-0.9308
2298.0	-0.9308
2299.0	-0.9308
2300.0	-0.9308
2301.0	-0.9308
2302.0	-0.9308
2303.0	-0.9308
2304.0	-0.9308
2305.0	-0.9308
2306.0	-0.9308
2307.0	-0.9308
2308.0	-0.9308
2309.0	-0.9308
2310.0	-0.9308
2311.0	-0.9308
2312.0	-0.9308
2313.0	-0.9308
2314.0	-0.9308
2315.0	-0.9308
2316.0	-0.9308
2317.0	-0.9308
2318.0	-0.9308
2319.0	-0.9308
2320.0	-0.9308
2321.0	-0.9308
2322.0	-0.9308
2323.0	-0.9308
2324.0	-0.9308
2325.0	-0.9308
2326.0	-0.9308
2327.0	-0.9308
2328.0	-0.9308
2329.0	-0.9308
2330.0	-0.9308
2331.0	-0.9308
2332.0	-0.9308
2333.0	-0.9308
2334.0	-0.9308
2335.0	-0.9308
2336.0	-0.9308
2337.0	-0.9308
2338.0	-0.9308
2339.0	-0.9308
2340.0	-0.9308
2341.0	-0.9308
2342.0	-0.9308
2343.0	-0.9308
2344.0	-0.9308
2345.0	-0.9308
2346.0	-0.9308
2347.0	-0.9308
2348.0	-0.9308
2349.0	-0.9308
2350.0	-0.9308
2351.0	-0.9308
2352.0	-0.9308
2353.0	-0.9308
2354.0	-0.9308
2355.0	-0.9308
2356.0	-0.9308
2357.0	-0.9308
2358.0	-0.9308
2359.0	-0.9308
2360.0	-0.9308
2361.0	-0.9308
2362.0	-0.9308
2363.0	-0.9308
2364.0	-0.9308
2365.0	-0.9308
2366.0	-0.9308
2367.0	-0.9308
2368.0	-0.9308
2369.0	-0.9308
2370.0	-0.9308
2371.0	-0.9308
2372.0	-0.9308
2373.0	-0.9308
2374.0	-0.9308
2375.0	-0.9308
2376.0	-0.9308
2377.0	-0.9308
2378.0	-0.9308
2379.0	-0.9308
2380.0	-0.9308
2381.0	-0.9308
2382.0	-0.9308
2383.0	-0.9308
2384.0	-0.9308
2385.0	-0.9308
2386.0	-0.9308
2387.0	-0.9308
2388.0	-0.9308
2389.0	-0.9308
2390.0	-0.9308
2391.0	-0.9308
2392.0	-0.9308
2393.0	-0.9308
2394.0	-0.9308
2395.0	-0.9308
2396.0	-0.9308
2397.0	-0.9308
2398.0	-0.9308
2399.0	-0.9308
2400.0	-0.9308
2401.0	-0.9308
2402.0	-0.9308
2403.0	-0.9308
2404.0	-0.9308
2405.0	-0.9308
2406.0	-0.9308
2407.0	-0.9308
2408.0	-0.9308
2409.0	-0.9308
2410.0	-0.9308
2411.0	-0.9308
2412.0	-0.9308
2413.0	-0.9308
2414.0	-0.9308
2415.0	-0.9308
2416.0	-0.9308
2417.0	-0.9308
2418.0	-0.9308
2419.0	-0.9308
2420.0	-0.9308
2421.0	-0.9308
2422.0	-0.9308
2423.0	-0.9308
2424.0	-0.9308
2425.0	-0.9308
2426.0	-0.9308
2427.0	-0.9308
2428.0	-0.9308
2429.0	-0.9308
2430.0	-0.9308
2431.0	-0.9308
2432.0	-0.9308
2433.0	-0.9308
2434.0	-0.9308
2435.0	-0.9308
2436.0	-0.9308
2437.0	-0.9308
2438.0	-0.9308
2439.0	-0.9308
2440.0	-0.9308
2441.0	-0.9308
2442.0	-0.9308
2443.0	-0.9308
2444.0	-0.9308
2445.0	-0.9308
2446.0	-0.9308
2447.0	-0.9308
2448.0	-0.9308
2449.0	-0.9308
2450.0	-0.9308
2451.0	-0.9308
2452.0	-0.9308
2453.0	-0.9308
2454.0	-0.9308
2455.0	-0.9308
2456.0	-0.9308
2457.0	-0.9308
2458.0	-0.9308
2459.0	-0.9308
2460.0	-0.9308
2461.0	-0.9308
2462.0	-0.9308
2463.0	-0.9308
2464.0	-0.9308
2465.0	-0.9308
2466.0	-0.9308
2467.0	-0.9308
2468.0	-0.9308
2469.0	-0.9308
2470.0	-0.9308
2471.0	-0.9308
2472.0	-0.9308
2473.0	-0.9308
2474.0	-0.9308
2475.0	-0.9308
2476.0	-0.9308
2477.0	-0.9308
2478.0	-0.9308
2479.0	-0.9308
2480.0	-0.9308
2481.0	-0.9308
2482.0	-0.9308
2483.0	-0.9308
2484.0	-0.9308
2485.0	-0.9308
2486.0	-0.9308
2487.0	-0.9308
2488.0	-0.9308
2489.0	-0.9308
2490.0	-0.9308
2491.0	-0.9308
2492.0	-0.9308
2493.0	-0.9308
2494.0	-0.9308
2495.0	-0.9308
2496.0	-0.9308
2497.0	-0.9308
2498.0	-0.9308
2499.0	-0.9308
2500.0	-0.9308
999999.0 0.0
-END-OF-DATA-
RCP_3PD_TotalCO2
NOTE: units of PgC yr-1, hence scaling of factor 8.3333e+013 (to mol yr-1) needed in user-config file, i.e.:
bg_par_atm_force_scale_val_3=8.3333e+013
