# Supplementary material for: Resolving ecological feedbacks on the ocean carbon sink in Earth system models
Source: Copernicus journal article supplement (doi:10.5194/esd-12-797-2021), 2021-07-14
Supplement: Supplementary file 1 [file esd-12-797-2021-supplement.zip › ESD ecoGEnIE supp. material/cGEnIE.muffin files/forcings/worlg4.FpCO2_Fp13CO2.RCP6p0.FeMahowald2006/biogem_force_flux_atm_pCO2_sig.dat]

-START-OF-DATA-
000000.0 0.0
1764.0 0.0
1765.0	0.003
1766.0	0.008338296
1767.0	0.013676593
1768.0	0.019014889
1769.0	0.024353185
1770.0	0.029691482
1771.0	0.036029778
1772.0	0.041368074
1773.0	0.046706371
1774.0	0.052044667
1775.0	0.057382963
1776.0	0.062721259
1777.0	0.068059556
1778.0	0.073397852
1779.0	0.078736148
1780.0	0.084074445
1781.0	0.090412741
1782.0	0.095751037
1783.0	0.101089334
1784.0	0.10642763
1785.0	0.11176593
1786.0	0.11710422
1787.0	0.12244252
1788.0	0.12778082
1789.0	0.13311911
1790.0	0.13845741
1791.0	0.1447957
1792.0	0.150134
1793.0	0.1554723
1794.0	0.16081059
1795.0	0.16614889
1796.0	0.17148719
1797.0	0.17782548
1798.0	0.18316378
1799.0	0.18850207
1800.0	0.19484037
1801.0	0.20017867
1802.0	0.20751696
1803.0	0.21185526
1804.0	0.21719356
1805.0	0.22253185
1806.0	0.22887015
1807.0	0.23420845
1808.0	0.23954674
1809.0	0.24488504
1810.0	0.25022333
1811.0	0.25656163
1812.0	0.26189993
1813.0	0.26723822
1814.0	0.27257652
1815.0	0.27891482
1816.0	0.28525311
1817.0	0.29159141
1818.0	0.2969297
1819.0	0.302268
1820.0	0.3076063
1821.0	0.31294459
1822.0	0.31928289
1823.0	0.32562119
1824.0	0.33095948
1825.0	0.33729778
1826.0	0.34263608
1827.0	0.34897437
1828.0	0.35431267
1829.0	0.35965096
1830.0	0.37098926
1831.0	0.37532756
1832.0	0.38066585
1833.0	0.38700415
1834.0	0.39234245
1835.0	0.39868074
1836.0	0.40801904
1837.0	0.41335733
1838.0	0.41969563
1839.0	0.42603393
1840.0	0.433372219
1841.0	0.439710519
1842.0	0.447048819
1843.0	0.453387109
1844.0	0.460725409
1845.0	0.470063709
1846.0	0.475401999
1847.0	0.483740299
1848.0	0.490078589
1849.0	0.498416889
1850.0	0.507755189
1851.0	0.500785689
1852.0	0.555622819
1853.0	0.556354489
1854.0	0.564817079
1855.0	0.564679249
1856.0	0.574934879
1857.0	0.581231999
1858.0	0.587232979
1859.0	0.597253889
1860.0	0.609966889
1861.0	0.623223598
1862.0	0.570716628
1863.0	0.57774912
1864.0	0.58613825
1865.0	0.59379536
1866.0	0.59691218
1867.0	0.60360622
1868.0	0.6072347
1869.0	0.61276645
1870.0	0.6166445
1871.0	0.64366524
1872.0	0.7403334
1873.0	0.76129965
1874.0	0.75771154
1875.0	0.77842647
1876.0	0.78787801
1877.0	0.79713853
1878.0	0.8050507
1879.0	0.82534752
1880.0	0.85724317
1881.0	0.89187292
1882.0	0.86066403
1883.0	0.88051762
1884.0	0.88712775
1885.0	0.8922361
1886.0	0.89814412
1887.0	0.91116314
1888.0	0.94173355
1889.0	0.94020019
1890.0	0.96775411
1891.0	0.98224854
1892.0	0.99719118
1893.0	0.9944033
1894.0	1.02336718
1895.0	1.0504185
1896.0	1.06527839
1897.0	1.08956411
1898.0	1.11600097
1899.0	1.15920445
1900.0	1.18720627
1901.0	1.25494317
1902.0	1.26897363
1903.0	1.34367095
1904.0	1.37229323
1905.0	1.4328152
1906.0	1.50353383
1907.0	1.58776273
1908.0	1.56141277
1909.0	1.60237806
1910.0	1.64098168
1911.0	1.61489404
1912.0	1.62684843
1913.0	1.66597976
1914.0	1.56479151
1915.0	1.54374963
1916.0	1.60911647
1917.0	1.66619629
1918.0	1.65030426
1919.0	1.52565434
1920.0	1.65328337
1921.0	1.5604166
1922.0	1.59294089
1923.0	1.72328818
1924.0	1.71986058
1925.0	1.73308854
1926.0	1.74448326
1927.0	1.85918283
1928.0	1.86467141
1929.0	1.96922601
1930.0	1.94887975
1931.0	1.84334081
1932.0	1.65922596
1933.0	1.70158848
1934.0	1.76986255
1935.0	1.82171575
1936.0	1.93129993
1937.0	1.98869902
1938.0	1.92388222
1939.0	1.97144376
1940.0	2.06583237
1941.0	2.08436458
1942.0	2.1110497
1943.0	2.1547656
1944.0	2.15139864
1945.0	1.92914739
1946.0	2.08014892
1947.0	2.26217994
1948.0	2.34413044
1949.0	2.30112641
1950.0	2.52233465
1951.0	2.8565201
1952.0	2.9056378
1953.0	2.9455171
1954.0	3.0171416
1955.0	3.2341855
1956.0	3.4226883
1957.0	3.5418718
1958.0	3.6495817
1959.0	3.6655957
1960.0	3.7692833
1961.0	3.8383218
1962.0	3.9355717
1963.0	4.0922947
1964.0	4.2595879
1965.0	4.4092558
1966.0	4.5986968
1967.0	4.7086254
1968.0	4.8232028
1969.0	5.0383879
1970.0	5.2731129
1971.0	5.3018913
1972.0	5.4460621
1973.0	5.6680986
1974.0	5.6827371
1975.0	5.6465876
1976.0	5.9736077
1977.0	6.1229874
1978.0	6.19537
1979.0	6.4517127
1980.0	6.3572096
1981.0	6.2128621
1982.0	6.3174055
1983.0	6.3355201
1984.0	6.5500833
1985.0	6.7193449
1986.0	6.8972023
1987.0	7.0470086
1988.0	7.2807248
1989.0	7.4126436
1990.0	7.4634833
1991.0	7.6159799
1992.0	7.4215304
1993.0	7.4221006
1994.0	7.5315956
1995.0	7.6470104
1996.0	7.7611025
1997.0	7.8371397
1998.0	7.8028431
1999.0	7.7517892
2000.0	7.8838
2001.0	8.0279
2002.0	8.1807
2003.0	8.5117
2004.0	8.9148
2005.0	9.1665
2006.0	9.2129
2007.0	9.2582
2008.0	9.3018334
2009.0	9.34546663
2010.0	9.3891
2011.0	9.38586
2012.0	9.38262
2013.0	9.37938
2014.0	9.37614
2015.0	9.3729
2016.0	9.36966
2017.0	9.36642
2018.0	9.36318
2019.0	9.35994
2020.0	9.3567
2021.0	9.36481
2022.0	9.37292
2023.0	9.38103
2024.0	9.38914
2025.0	9.39725
2026.0	9.40536
2027.0	9.41347
2028.0	9.42158
2029.0	9.42969
2030.0	9.4378
2031.0	9.57804
2032.0	9.71828
2033.0	9.85852
2034.0	9.99876
2035.0	10.139
2036.0	10.27924
2037.0	10.41948
2038.0	10.55972
2039.0	10.69996
2040.0	10.8402
2041.0	11.01418
2042.0	11.18816
2043.0	11.36214
2044.0	11.53612
2045.0	11.7101
2046.0	11.88408
2047.0	12.05806
2048.0	12.23204
2049.0	12.40602
2050.0	12.58
2051.0	12.7786
2052.0	12.9772
2053.0	13.1758
2054.0	13.3744
2055.0	13.573
2056.0	13.7716
2057.0	13.9702
2058.0	14.1688
2059.0	14.3674
2060.0	14.566
2061.0	14.75707
2062.0	14.94814
2063.0	15.13921
2064.0	15.33028
2065.0	15.52135
2066.0	15.71242
2067.0	15.90349
2068.0	16.09456
2069.0	16.28563
2070.0	16.4767
2071.0	16.5815
2072.0	16.6863
2073.0	16.7911
2074.0	16.8959
2075.0	17.0007
2076.0	17.1055
2077.0	17.2103
2078.0	17.3151
2079.0	17.4199
2080.0	17.5247
2081.0	17.22779
2082.0	16.93088
2083.0	16.63397
2084.0	16.33706
2085.0	16.04015
2086.0	15.74324
2087.0	15.44633
2088.0	15.14942
2089.0	14.85251
2090.0	14.5556
2091.0	14.49351
2092.0	14.43142
2093.0	14.36933
2094.0	14.30724
2095.0	14.24515
2096.0	14.18306
2097.0	14.12097
2098.0	14.05888
2099.0	13.99679
2100.0	13.9347
2101.0	13.72238
2102.0	13.51006
2103.0	13.29774
2104.0	13.08542
2105.0	12.8731
2106.0	12.66078
2107.0	12.44846
2108.0	12.23614
2109.0	12.02382
2110.0	11.8115
2111.0	11.59918
2112.0	11.38686
2113.0	11.17454
2114.0	10.96222
2115.0	10.7499
2116.0	10.53758
2117.0	10.32526
2118.0	10.11294
2119.0	9.90062
2120.0	9.6883
2121.0	9.47598
2122.0	9.26366
2123.0	9.05134
2124.0	8.83902
2125.0	8.6267
2126.0	8.4216348
2127.0	8.2165696
2128.0	8.0115043
2129.0	7.8064391
2130.0	7.6013739
2131.0	7.3963087
2132.0	7.1912435
2133.0	6.9861783
2134.0	6.781113
2135.0	6.5760478
2136.0	6.3709826
2137.0	6.1659174
2138.0	5.9608522
2139.0	5.755787
2140.0	5.5507217
2141.0	5.3456565
2142.0	5.1405913
2143.0	4.9355261
2144.0	4.7304609
2145.0	4.5253957
2146.0	4.3203304
2147.0	4.1152652
2148.0	3.9102
2149.0	3.5678
2150.0	3.5062
2151.0	3.4375
2152.0	3.3717
2153.0	3.3114
2154.0	3.2545
2155.0	3.2005
2156.0	3.15264
2157.0	3.10478
2158.0	3.05692
2159.0	3.00906
2160.0	2.9612
2161.0	2.92104
2162.0	2.88088
2163.0	2.84072
2164.0	2.80056
2165.0	2.7604
2166.0	2.7258
2167.0	2.6912
2168.0	2.6566
2169.0	2.622
2170.0	2.5874
2171.0	2.55704
2172.0	2.52668
2173.0	2.49632
2174.0	2.46596
2175.0	2.4356
2176.0	2.40884
2177.0	2.38208
2178.0	2.35532
2179.0	2.32856
2180.0	2.3018
2181.0	2.27802
2182.0	2.25424
2183.0	2.23046
2184.0	2.20668
2185.0	2.1829
2186.0	2.1617
2187.0	2.1405
2188.0	2.1193
2189.0	2.0981
2190.0	2.0769
2191.0	2.05792
2192.0	2.03894
2193.0	2.01996
2194.0	2.00098
2195.0	1.982
2196.0	1.96498
2197.0	1.94796
2198.0	1.93094
2199.0	1.91392
2200.0	1.8969
2201.0	1.88235
2202.0	1.8678
2203.0	1.85325
2204.0	1.8387
2205.0	1.82415
2206.0	1.8096
2207.0	1.79505
2208.0	1.7805
2209.0	1.76595
2210.0	1.7514
2211.0	1.73953
2212.0	1.72766
2213.0	1.71579
2214.0	1.70392
2215.0	1.69205
2216.0	1.68018
2217.0	1.66831
2218.0	1.65644
2219.0	1.64457
2220.0	1.6327
2221.0	1.62294
2222.0	1.61318
2223.0	1.60342
2224.0	1.59366
2225.0	1.5839
2226.0	1.57414
2227.0	1.56438
2228.0	1.55462
2229.0	1.54486
2230.0	1.5351
2231.0	1.52697
2232.0	1.51884
2233.0	1.51071
2234.0	1.50258
2235.0	1.49445
2236.0	1.48632
2237.0	1.47819
2238.0	1.47006
2239.0	1.46193
2240.0	1.4538
2241.0	1.44702
2242.0	1.44024
2243.0	1.43346
2244.0	1.42668
2245.0	1.4199
2246.0	1.41312
2247.0	1.40634
2248.0	1.39956
2249.0	1.39278
2250.0	1.386
2251.0	1.380872
2252.0	1.375744
2253.0	1.370616
2254.0	1.365488
2255.0	1.36036
2256.0	1.355232
2257.0	1.350104
2258.0	1.344976
2259.0	1.339848
2260.0	1.33472
2261.0	1.329592
2262.0	1.324464
2263.0	1.319336
2264.0	1.314208
2265.0	1.30908
2266.0	1.303952
2267.0	1.298824
2268.0	1.293696
2269.0	1.288568
2270.0	1.28344
2271.0	1.278312
2272.0	1.273184
2273.0	1.268056
2274.0	1.262928
2275.0	1.2578
2276.0	1.254232
2277.0	1.250664
2278.0	1.247096
2279.0	1.243528
2280.0	1.23996
2281.0	1.236392
2282.0	1.232824
2283.0	1.229256
2284.0	1.225688
2285.0	1.22212
2286.0	1.218552
2287.0	1.214984
2288.0	1.211416
2289.0	1.207848
2290.0	1.20428
2291.0	1.200712
2292.0	1.197144
2293.0	1.193576
2294.0	1.190008
2295.0	1.18644
2296.0	1.182872
2297.0	1.179304
2298.0	1.175736
2299.0	1.172168
2300.0	1.1686
2301.0	1.165964
2302.0	1.163328
2303.0	1.160692
2304.0	1.158056
2305.0	1.15542
2306.0	1.152784
2307.0	1.150148
2308.0	1.147512
2309.0	1.144876
2310.0	1.14224
2311.0	1.139604
2312.0	1.136968
2313.0	1.134332
2314.0	1.131696
2315.0	1.12906
2316.0	1.126424
2317.0	1.123788
2318.0	1.121152
2319.0	1.118516
2320.0	1.11588
2321.0	1.113244
2322.0	1.110608
2323.0	1.107972
2324.0	1.105336
2325.0	1.1027
2326.0	1.100632
2327.0	1.098564
2328.0	1.096496
2329.0	1.094428
2330.0	1.09236
2331.0	1.090292
2332.0	1.088224
2333.0	1.086156
2334.0	1.084088
2335.0	1.08202
2336.0	1.079952
2337.0	1.077884
2338.0	1.075816
2339.0	1.073748
2340.0	1.07168
2341.0	1.069612
2342.0	1.067544
2343.0	1.065476
2344.0	1.063408
2345.0	1.06134
2346.0	1.059272
2347.0	1.057204
2348.0	1.055136
2349.0	1.053068
2350.0	1.051
2351.0	1.049292
2352.0	1.047584
2353.0	1.045876
2354.0	1.044168
2355.0	1.04246
2356.0	1.040752
2357.0	1.039044
2358.0	1.037336
2359.0	1.035628
2360.0	1.03392
2361.0	1.032212
2362.0	1.030504
2363.0	1.028796
2364.0	1.027088
2365.0	1.02538
2366.0	1.023672
2367.0	1.021964
2368.0	1.020256
2369.0	1.018548
2370.0	1.01684
2371.0	1.015132
2372.0	1.013424
2373.0	1.011716
2374.0	1.010008
2375.0	1.0083
2376.0	1.006816
2377.0	1.005332
2378.0	1.003848
2379.0	1.002364
2380.0	1.00088
2381.0	0.999396
2382.0	0.997912
2383.0	0.996428
2384.0	0.994944
2385.0	0.99346
2386.0	0.991976
2387.0	0.990492
2388.0	0.989008
2389.0	0.987524
2390.0	0.98604
2391.0	0.984556
2392.0	0.983072
2393.0	0.981588
2394.0	0.980104
2395.0	0.97862
2396.0	0.977136
2397.0	0.975652
2398.0	0.974168
2399.0	0.972684
2400.0	0.9712
2401.0	0.969888
2402.0	0.968576
2403.0	0.967264
2404.0	0.965952
2405.0	0.96464
2406.0	0.963328
2407.0	0.962016
2408.0	0.960704
2409.0	0.959392
2410.0	0.95808
2411.0	0.956768
2412.0	0.955456
2413.0	0.954144
2414.0	0.952832
2415.0	0.95152
2416.0	0.950208
2417.0	0.948896
2418.0	0.947584
2419.0	0.946272
2420.0	0.94496
2421.0	0.943648
2422.0	0.942336
2423.0	0.941024
2424.0	0.939712
2425.0	0.9384
2426.0	0.937196
2427.0	0.935992
2428.0	0.934788
2429.0	0.933584
2430.0	0.93238
2431.0	0.931176
2432.0	0.929972
2433.0	0.928768
2434.0	0.927564
2435.0	0.92636
2436.0	0.925156
2437.0	0.923952
2438.0	0.922748
2439.0	0.921544
2440.0	0.92034
2441.0	0.919136
2442.0	0.917932
2443.0	0.916728
2444.0	0.915524
2445.0	0.91432
2446.0	0.913116
2447.0	0.911912
2448.0	0.910708
2449.0	0.909504
2450.0	0.9083
2451.0	0.907176
2452.0	0.906052
2453.0	0.904928
2454.0	0.903804
2455.0	0.90268
2456.0	0.901556
2457.0	0.900432
2458.0	0.899308
2459.0	0.898184
2460.0	0.89706
2461.0	0.895936
2462.0	0.894812
2463.0	0.893688
2464.0	0.892564
2465.0	0.89144
2466.0	0.890316
2467.0	0.889192
2468.0	0.888068
2469.0	0.886944
2470.0	0.88582
2471.0	0.884696
2472.0	0.883572
2473.0	0.882448
2474.0	0.881324
2475.0	0.8802
2476.0	0.879152
2477.0	0.878104
2478.0	0.877056
2479.0	0.876008
2480.0	0.87496
2481.0	0.873912
2482.0	0.872864
2483.0	0.871816
2484.0	0.870768
2485.0	0.86972
2486.0	0.868672
2487.0	0.867624
2488.0	0.866576
2489.0	0.865528
2490.0	0.86448
2491.0	0.863432
2492.0	0.862384
2493.0	0.861336
2494.0	0.860288
2495.0	0.85924
2496.0	0.858192
2497.0	0.857144
2498.0	0.856096
2499.0	0.855048
2500.0	0.854
999999.0 0.0
-END-OF-DATA-
RCP_6p0_TotalCO2
NOTE: units of PgC yr-1, hence scaling of factor 8.3333e+013 (to mol yr-1) needed in user-config file, i.e.:
bg_par_atm_force_scale_val_3=8.3333e+013
