# Supplementary material for: Resolving ecological feedbacks on the ocean carbon sink in Earth system models
Source: Copernicus journal article supplement (doi:10.5194/esd-12-797-2021), 2021-07-14
Supplement: Supplementary file 1 [file esd-12-797-2021-supplement.zip › ESD ecoGEnIE supp. material/cGEnIE.muffin files/forcings/worlg4.FpCO2_Fp13CO2.RCP8p5.FeMahowald2006/biogem_force_flux_atm_pCO2_13C_sig.dat]

-START-OF-DATA-
0.0       1.0
999999.0  1.0
-END-OF-DATA-

NOTE: the required scaling for the isotopic composition of fossil fuel carbon is:
bg_par_atm_force_scale_val_4=-27.0
