# Supplementary material for: Resolving ecological feedbacks on the ocean carbon sink in Earth system models
Source: Copernicus journal article supplement (doi:10.5194/esd-12-797-2021), 2021-07-14
Supplement: Supplementary file 1 [file esd-12-797-2021-supplement.zip › ESD ecoGEnIE supp. material/cGEnIE.muffin files/forcings/worlg4.FpCO2_Fp13CO2.RCP8p5.FeMahowald2006/biogem_force_flux_atm_pCO2_sig.dat]

-START-OF-DATA-
000000.0 0.0
1764.0 0.0
1765.0	0.003
1766.0	0.008338296
1767.0	0.013676593
1768.0	0.019014889
1769.0	0.024353185
1770.0	0.029691482
1771.0	0.036029778
1772.0	0.041368074
1773.0	0.046706371
1774.0	0.052044667
1775.0	0.057382963
1776.0	0.062721259
1777.0	0.068059556
1778.0	0.073397852
1779.0	0.078736148
1780.0	0.084074445
1781.0	0.090412741
1782.0	0.095751037
1783.0	0.101089334
1784.0	0.10642763
1785.0	0.11176593
1786.0	0.11710422
1787.0	0.12244252
1788.0	0.12778082
1789.0	0.13311911
1790.0	0.13845741
1791.0	0.1447957
1792.0	0.150134
1793.0	0.1554723
1794.0	0.16081059
1795.0	0.16614889
1796.0	0.17148719
1797.0	0.17782548
1798.0	0.18316378
1799.0	0.18850207
1800.0	0.19484037
1801.0	0.20017867
1802.0	0.20751696
1803.0	0.21185526
1804.0	0.21719356
1805.0	0.22253185
1806.0	0.22887015
1807.0	0.23420845
1808.0	0.23954674
1809.0	0.24488504
1810.0	0.25022333
1811.0	0.25656163
1812.0	0.26189993
1813.0	0.26723822
1814.0	0.27257652
1815.0	0.27891482
1816.0	0.28525311
1817.0	0.29159141
1818.0	0.2969297
1819.0	0.302268
1820.0	0.3076063
1821.0	0.31294459
1822.0	0.31928289
1823.0	0.32562119
1824.0	0.33095948
1825.0	0.33729778
1826.0	0.34263608
1827.0	0.34897437
1828.0	0.35431267
1829.0	0.35965096
1830.0	0.37098926
1831.0	0.37532756
1832.0	0.38066585
1833.0	0.38700415
1834.0	0.39234245
1835.0	0.39868074
1836.0	0.40801904
1837.0	0.41335733
1838.0	0.41969563
1839.0	0.42603393
1840.0	0.433372219
1841.0	0.439710519
1842.0	0.447048819
1843.0	0.453387109
1844.0	0.460725409
1845.0	0.470063709
1846.0	0.475401999
1847.0	0.483740299
1848.0	0.490078589
1849.0	0.498416889
1850.0	0.507755189
1851.0	0.500785689
1852.0	0.555622819
1853.0	0.556354489
1854.0	0.564817079
1855.0	0.564679249
1856.0	0.574934879
1857.0	0.581231999
1858.0	0.587232979
1859.0	0.597253889
1860.0	0.609966889
1861.0	0.623223598
1862.0	0.570716628
1863.0	0.57774912
1864.0	0.58613825
1865.0	0.59379536
1866.0	0.59691218
1867.0	0.60360622
1868.0	0.6072347
1869.0	0.61276645
1870.0	0.6166445
1871.0	0.64366524
1872.0	0.7403334
1873.0	0.76129965
1874.0	0.75771154
1875.0	0.77842647
1876.0	0.78787801
1877.0	0.79713853
1878.0	0.8050507
1879.0	0.82534752
1880.0	0.85724317
1881.0	0.89187292
1882.0	0.86066403
1883.0	0.88051762
1884.0	0.88712775
1885.0	0.8922361
1886.0	0.89814412
1887.0	0.91116314
1888.0	0.94173355
1889.0	0.94020019
1890.0	0.96775411
1891.0	0.98224854
1892.0	0.99719118
1893.0	0.9944033
1894.0	1.02336718
1895.0	1.0504185
1896.0	1.06527839
1897.0	1.08956411
1898.0	1.11600097
1899.0	1.15920445
1900.0	1.18720627
1901.0	1.25494317
1902.0	1.26897363
1903.0	1.34367095
1904.0	1.37229323
1905.0	1.4328152
1906.0	1.50353383
1907.0	1.58776273
1908.0	1.56141277
1909.0	1.60237806
1910.0	1.64098168
1911.0	1.61489404
1912.0	1.62684843
1913.0	1.66597976
1914.0	1.56479151
1915.0	1.54374963
1916.0	1.60911647
1917.0	1.66619629
1918.0	1.65030426
1919.0	1.52565434
1920.0	1.65328337
1921.0	1.5604166
1922.0	1.59294089
1923.0	1.72328818
1924.0	1.71986058
1925.0	1.73308854
1926.0	1.74448326
1927.0	1.85918283
1928.0	1.86467141
1929.0	1.96922601
1930.0	1.94887975
1931.0	1.84334081
1932.0	1.65922596
1933.0	1.70158848
1934.0	1.76986255
1935.0	1.82171575
1936.0	1.93129993
1937.0	1.98869902
1938.0	1.92388222
1939.0	1.97144376
1940.0	2.06583237
1941.0	2.08436458
1942.0	2.1110497
1943.0	2.1547656
1944.0	2.15139864
1945.0	1.92914739
1946.0	2.08014892
1947.0	2.26217994
1948.0	2.34413044
1949.0	2.30112641
1950.0	2.52233465
1951.0	2.8565201
1952.0	2.9056378
1953.0	2.9455171
1954.0	3.0171416
1955.0	3.2341855
1956.0	3.4226883
1957.0	3.5418718
1958.0	3.6495817
1959.0	3.6655957
1960.0	3.7692833
1961.0	3.8383218
1962.0	3.9355717
1963.0	4.0922947
1964.0	4.2595879
1965.0	4.4092558
1966.0	4.5986968
1967.0	4.7086254
1968.0	4.8232028
1969.0	5.0383879
1970.0	5.2731129
1971.0	5.3018913
1972.0	5.4460621
1973.0	5.6680986
1974.0	5.6827371
1975.0	5.6465876
1976.0	5.9736077
1977.0	6.1229874
1978.0	6.19537
1979.0	6.4517127
1980.0	6.3572096
1981.0	6.2128621
1982.0	6.3174055
1983.0	6.3355201
1984.0	6.5500833
1985.0	6.7193449
1986.0	6.8972023
1987.0	7.0470086
1988.0	7.2807248
1989.0	7.4126436
1990.0	7.4634833
1991.0	7.6159799
1992.0	7.4215304
1993.0	7.4221006
1994.0	7.5315956
1995.0	7.6470104
1996.0	7.7611025
1997.0	7.8371397
1998.0	7.8028431
1999.0	7.7517892
2000.0	7.8838
2001.0	8.0279
2002.0	8.1807
2003.0	8.5117
2004.0	8.9148
2005.0	9.1665
2006.0	9.3265
2007.0	9.4872
2008.0	9.6479
2009.0	9.8086
2010.0	9.9693
2011.0	10.21677
2012.0	10.46424
2013.0	10.71171
2014.0	10.95918
2015.0	11.20665
2016.0	11.45412
2017.0	11.70159
2018.0	11.94906
2019.0	12.19653
2020.0	12.444
2021.0	12.65501
2022.0	12.86602
2023.0	13.07703
2024.0	13.28804
2025.0	13.49905
2026.0	13.71006
2027.0	13.92107
2028.0	14.13208
2029.0	14.34309
2030.0	14.5541
2031.0	14.84185
2032.0	15.1296
2033.0	15.41735
2034.0	15.7051
2035.0	15.99285
2036.0	16.2806
2037.0	16.56835
2038.0	16.8561
2039.0	17.14385
2040.0	17.4316
2041.0	17.7665
2042.0	18.1014
2043.0	18.4363
2044.0	18.7712
2045.0	19.1061
2046.0	19.441
2047.0	19.7759
2048.0	20.1108
2049.0	20.4457
2050.0	20.7806
2051.0	21.11225
2052.0	21.4439
2053.0	21.77555
2054.0	22.1072
2055.0	22.43885
2056.0	22.7705
2057.0	23.10215
2058.0	23.4338
2059.0	23.76545
2060.0	24.0971
2061.0	24.32481
2062.0	24.55252
2063.0	24.78023
2064.0	25.00794
2065.0	25.23565
2066.0	25.46336
2067.0	25.69107
2068.0	25.91878
2069.0	26.14649
2070.0	26.3742
2071.0	26.50829
2072.0	26.64238
2073.0	26.77647
2074.0	26.91056
2075.0	27.04465
2076.0	27.17874
2077.0	27.31283
2078.0	27.44692
2079.0	27.58101
2080.0	27.7151
2081.0	27.79666
2082.0	27.87822
2083.0	27.95978
2084.0	28.04134
2085.0	28.1229
2086.0	28.20446
2087.0	28.28602
2088.0	28.36758
2089.0	28.44914
2090.0	28.5307
2091.0	28.55933
2092.0	28.58796
2093.0	28.61659
2094.0	28.64522
2095.0	28.67385
2096.0	28.70248
2097.0	28.73111
2098.0	28.75974
2099.0	28.78837
2100.0	28.817
2101.0	28.81392
2102.0	28.81084
2103.0	28.80776
2104.0	28.80468
2105.0	28.8016
2106.0	28.79852
2107.0	28.79544
2108.0	28.79236
2109.0	28.78928
2110.0	28.7862
2111.0	28.78312
2112.0	28.78004
2113.0	28.77696
2114.0	28.77388
2115.0	28.7708
2116.0	28.76772
2117.0	28.76464
2118.0	28.76156
2119.0	28.75848
2120.0	28.7554
2121.0	28.75232
2122.0	28.74924
2123.0	28.74616
2124.0	28.74308
2125.0	28.74
2126.0	28.74
2127.0	28.74
2128.0	28.74
2129.0	28.74
2130.0	28.74
2131.0	28.74
2132.0	28.74
2133.0	28.74
2134.0	28.74
2135.0	28.74
2136.0	28.74
2137.0	28.74
2138.0	28.74
2139.0	28.74
2140.0	28.74
2141.0	28.74
2142.0	28.74
2143.0	28.74
2144.0	28.74
2145.0	28.74
2146.0	28.74
2147.0	28.74
2148.0	28.74
2149.0	28.74
2150.0	28.74
2151.0	28.470205
2152.0	28.20041
2153.0	27.930615
2154.0	27.66082
2155.0	27.391026
2156.0	27.121231
2157.0	26.851436
2158.0	26.581641
2159.0	26.311846
2160.0	26.042051
2161.0	25.772256
2162.0	25.502461
2163.0	25.232666
2164.0	24.962871
2165.0	24.693077
2166.0	24.423282
2167.0	24.153487
2168.0	23.883692
2169.0	23.613897
2170.0	23.344102
2171.0	23.074307
2172.0	22.804512
2173.0	22.534717
2174.0	22.264922
2175.0	21.995128
2176.0	21.725333
2177.0	21.455538
2178.0	21.185743
2179.0	20.915948
2180.0	20.646153
2181.0	20.376358
2182.0	20.106563
2183.0	19.836768
2184.0	19.566973
2185.0	19.297179
2186.0	19.027384
2187.0	18.757589
2188.0	18.487794
2189.0	18.217999
2190.0	17.948204
2191.0	17.678409
2192.0	17.408614
2193.0	17.138819
2194.0	16.869024
2195.0	16.59923
2196.0	16.329435
2197.0	16.05964
2198.0	15.789845
2199.0	15.52005
2200.0	15.250255
2201.0	14.98046
2202.0	14.710665
2203.0	14.44087
2204.0	14.171076
2205.0	13.901281
2206.0	13.631486
2207.0	13.361691
2208.0	13.091896
2209.0	12.822101
2210.0	12.552306
2211.0	12.282511
2212.0	12.012716
2213.0	11.742921
2214.0	11.473127
2215.0	11.203332
2216.0	10.933537
2217.0	10.663742
2218.0	10.393947
2219.0	10.124152
2220.0	9.8543571
2221.0	9.5845622
2222.0	9.3147673
2223.0	9.0449724
2224.0	8.7751776
2225.0	8.5053827
2226.0	8.2355878
2227.0	7.9657929
2228.0	7.695998
2229.0	7.4262031
2230.0	7.1564082
2231.0	6.8866133
2232.0	6.6168184
2233.0	6.3470235
2234.0	6.0772286
2235.0	5.8074337
2236.0	5.5376388
2237.0	5.2678439
2238.0	4.998049
2239.0	4.7282541
2240.0	4.4584592
2241.0	4.1886643
2242.0	3.9188694
2243.0	3.6490745
2244.0	3.3792796
2245.0	3.1094847
2246.0	2.8396898
2247.0	2.5698949
2248.0	2.3001
2249.0	2.088
2250.0	2.0458
2251.0	2.05004
2252.0	2.05428
2253.0	2.05852
2254.0	2.06276
2255.0	2.067
2256.0	2.07852
2257.0	2.09004
2258.0	2.10156
2259.0	2.11308
2260.0	2.1246
2261.0	2.1217267
2262.0	2.1188533
2263.0	2.11598
2264.0	2.1131067
2265.0	2.1102333
2266.0	2.10736
2267.0	2.1044867
2268.0	2.1016133
2269.0	2.09874
2270.0	2.0958667
2271.0	2.0929933
2272.0	2.09012
2273.0	2.0872467
2274.0	2.0843733
2275.0	2.0815
2276.0	2.078004
2277.0	2.074508
2278.0	2.071012
2279.0	2.067516
2280.0	2.06402
2281.0	2.060524
2282.0	2.057028
2283.0	2.053532
2284.0	2.050036
2285.0	2.04654
2286.0	2.043044
2287.0	2.039548
2288.0	2.036052
2289.0	2.032556
2290.0	2.02906
2291.0	2.025564
2292.0	2.022068
2293.0	2.018572
2294.0	2.015076
2295.0	2.01158
2296.0	2.008084
2297.0	2.004588
2298.0	2.001092
2299.0	1.997596
2300.0	1.9941
2301.0	1.991988
2302.0	1.989876
2303.0	1.987764
2304.0	1.985652
2305.0	1.98354
2306.0	1.981428
2307.0	1.979316
2308.0	1.977204
2309.0	1.975092
2310.0	1.97298
2311.0	1.970868
2312.0	1.968756
2313.0	1.966644
2314.0	1.964532
2315.0	1.96242
2316.0	1.960308
2317.0	1.958196
2318.0	1.956084
2319.0	1.953972
2320.0	1.95186
2321.0	1.949748
2322.0	1.947636
2323.0	1.945524
2324.0	1.943412
2325.0	1.9413
2326.0	1.939188
2327.0	1.937076
2328.0	1.934964
2329.0	1.932852
2330.0	1.93074
2331.0	1.928628
2332.0	1.926516
2333.0	1.924404
2334.0	1.922292
2335.0	1.92018
2336.0	1.918068
2337.0	1.915956
2338.0	1.913844
2339.0	1.911732
2340.0	1.90962
2341.0	1.907508
2342.0	1.905396
2343.0	1.903284
2344.0	1.901172
2345.0	1.89906
2346.0	1.896948
2347.0	1.894836
2348.0	1.892724
2349.0	1.890612
2350.0	1.8885
2351.0	1.885994
2352.0	1.883488
2353.0	1.880982
2354.0	1.878476
2355.0	1.87597
2356.0	1.873464
2357.0	1.870958
2358.0	1.868452
2359.0	1.865946
2360.0	1.86344
2361.0	1.860934
2362.0	1.858428
2363.0	1.855922
2364.0	1.853416
2365.0	1.85091
2366.0	1.848404
2367.0	1.845898
2368.0	1.843392
2369.0	1.840886
2370.0	1.83838
2371.0	1.835874
2372.0	1.833368
2373.0	1.830862
2374.0	1.828356
2375.0	1.82585
2376.0	1.823344
2377.0	1.820838
2378.0	1.818332
2379.0	1.815826
2380.0	1.81332
2381.0	1.810814
2382.0	1.808308
2383.0	1.805802
2384.0	1.803296
2385.0	1.80079
2386.0	1.798284
2387.0	1.795778
2388.0	1.793272
2389.0	1.790766
2390.0	1.78826
2391.0	1.785754
2392.0	1.783248
2393.0	1.780742
2394.0	1.778236
2395.0	1.77573
2396.0	1.773224
2397.0	1.770718
2398.0	1.768212
2399.0	1.765706
2400.0	1.7632
2401.0	1.760278
2402.0	1.757356
2403.0	1.754434
2404.0	1.751512
2405.0	1.74859
2406.0	1.745668
2407.0	1.742746
2408.0	1.739824
2409.0	1.736902
2410.0	1.73398
2411.0	1.731058
2412.0	1.728136
2413.0	1.725214
2414.0	1.722292
2415.0	1.71937
2416.0	1.716448
2417.0	1.713526
2418.0	1.710604
2419.0	1.707682
2420.0	1.70476
2421.0	1.701838
2422.0	1.698916
2423.0	1.695994
2424.0	1.693072
2425.0	1.69015
2426.0	1.687228
2427.0	1.684306
2428.0	1.681384
2429.0	1.678462
2430.0	1.67554
2431.0	1.672618
2432.0	1.669696
2433.0	1.666774
2434.0	1.663852
2435.0	1.66093
2436.0	1.658008
2437.0	1.655086
2438.0	1.652164
2439.0	1.649242
2440.0	1.64632
2441.0	1.643398
2442.0	1.640476
2443.0	1.637554
2444.0	1.634632
2445.0	1.63171
2446.0	1.628788
2447.0	1.625866
2448.0	1.622944
2449.0	1.620022
2450.0	1.6171
2451.0	1.61445
2452.0	1.6118
2453.0	1.60915
2454.0	1.6065
2455.0	1.60385
2456.0	1.6012
2457.0	1.59855
2458.0	1.5959
2459.0	1.59325
2460.0	1.5906
2461.0	1.58795
2462.0	1.5853
2463.0	1.58265
2464.0	1.58
2465.0	1.57735
2466.0	1.5747
2467.0	1.57205
2468.0	1.5694
2469.0	1.56675
2470.0	1.5641
2471.0	1.56145
2472.0	1.5588
2473.0	1.55615
2474.0	1.5535
2475.0	1.55085
2476.0	1.5482
2477.0	1.54555
2478.0	1.5429
2479.0	1.54025
2480.0	1.5376
2481.0	1.53495
2482.0	1.5323
2483.0	1.52965
2484.0	1.527
2485.0	1.52435
2486.0	1.5217
2487.0	1.51905
2488.0	1.5164
2489.0	1.51375
2490.0	1.5111
2491.0	1.50845
2492.0	1.5058
2493.0	1.50315
2494.0	1.5005
2495.0	1.49785
2496.0	1.4952
2497.0	1.49255
2498.0	1.4899
2499.0	1.48725
2500.0	1.4846
999999.0 0.0
-END-OF-DATA-
RCP_8p5_TotalCO2
NOTE: units of PgC yr-1, hence scaling of factor 8.3333e+013 (to mol yr-1) needed in user-config file, i.e.:
bg_par_atm_force_scale_val_3=8.3333e+013
