# Supplementary material for: Resolving ecological feedbacks on the ocean carbon sink in Earth system models
Source: Copernicus journal article supplement (doi:10.5194/esd-12-797-2021), 2021-07-14
Supplement: Supplementary file 1 [file esd-12-797-2021-supplement.zip › ESD ecoGEnIE supp. material/cGEnIE.muffin files/forcings/worlg4.FpCO2_Fp13CO2.RCP8p5.FeMahowald2006/configure_forcings_atm.dat]

  00 01 02   03 04 05 06  07  08
  \/ \/ \/   \/ \/ \/ \/  \/  \/

-START-OF-DATA-
 03  f  0.1  t  t  F   2  01  01  '[carbon dioxide (CO2) partial pressure (atm)]'
 04  f  0.1  t  t  F   2  01  01  '[d13C CO2 (o/oo)]'
-END-OF-DATA-

  /\ /\ /\   /\ /\ /\ /\  /\  /\
  00 01 02   03 04 05 06  07  08

DATA FORMAT AND ORDER:

COLUMN #00: TRACER NUMBER
COLUMN #01: include restoring forcing of tracer? [DATA FORMAT: 'T'/'F' ('t'/'f')]
COLUMN #02: time constant of restoring forcing (years) [DATA FORMAT: real]
COLUMN #03: include flux forcing of tracer? [DATA FORMAT: 'T'/'F' ('t'/'f')]
COLUMN #04: scale flux forcing of tracer? [DATA FORMAT: 'T'/'F' ('t'/'f')]
COLUMN #05: force ocean surface in equilibrium with atmosphere? (needs ocean restoring forcing set) [DATA FORMAT: 'T'/'F' ('t'/'f')]
COLUMN #06: make forcing uniform over this dimension (2 = 2D, 0 = point, ELSE spatially explicit forcing) [DATA FORMAT: interger]
COLUMN #07: i grid location of point forcing [DATA FORMAT: interger]
COLUMN #08: j grid location of point forcing [DATA FORMAT: interger]
COLUMN END: TRACER DESCRIPTION
