# Supplementary material for: Resolving ecological feedbacks on the ocean carbon sink in Earth system models
Source: Copernicus journal article supplement (doi:10.5194/esd-12-797-2021), 2021-07-14
Supplement: Supplementary file 1 [file esd-12-797-2021-supplement.zip › ESD ecoGEnIE supp. material/cGEnIE.muffin files/forcings/worlg4.FpCO2_Fp13CO2.RCP8p5.FeMahowald2006/configure_forcings_ocn.dat]

  00 01 02 03   04 05 06  07  08  09
  \/ \/ \/ \/   \/ \/ \/  \/  \/  \/

-START-OF-DATA-
-END-OF-DATA-

  /\ /\ /\ /\   /\ /\ /\  /\  /\  /\
  00 01 02 03   04 05 06  07  08  09

DATA FORMAT AND ORDER
---------------------

COLUMN #00: TRACER NUMBER
COLUMN #01: include restoring forcing of tracer? [DATA FORMAT: 'T'/'F' ('t'/'f')]
COLUMN #02: restrict restoring forcing to surface? [DATA FORMAT: 'T'/'F' ('t'/'f')]
COLUMN #03: time constant of restoring forcing (years) [DATA FORMAT: real]
COLUMN #04: include flux forcing of tracer? [DATA FORMAT: 'T'/'F' ('t'/'f')]
COLUMN #05: scale flux forcing of tracer? [DATA FORMAT: 'T'/'F' ('t'/'f')]
COLUMN #06: make forcing uniform over this dimension (3 == 3D, 2 == 2D, 0 == point, -1 == SURFACE, -2 == BENTHIC, ELSE spatially explicit forcing) [DATA FORMAT: interger]
COLUMN #07: i grid location of point forcing [DATA FORMAT: interger]
COLUMN #08: j grid location of point forcing [DATA FORMAT: interger]
COLUMN #09: k grid location of point forcing [DATA FORMAT: interger]
COLUMN END: TRACER DESCRIPTION
