# Supplementary material for: Resolving ecological feedbacks on the ocean carbon sink in Earth system models
Source: Copernicus journal article supplement (doi:10.5194/esd-12-797-2021), 2021-07-14
Supplement: Supplementary file 1 [file esd-12-797-2021-supplement.zip › ESD ecoGEnIE supp. material/cGEnIE.muffin files/muffin_commands.txt]

# Following default installation of cGEnIE.muffin (v.0.9.13) and transferring base.config/experiment/forcing/spin-up 
# restart files to the appropriate directories (see muffin manual for details), run the following commands for each 
# experiment from: $HOME/cgenie.muffin/genie-main (replace .default with .recalib for reclibrated configurations)

# BioFPR

nohup ./runmuffin.sh McKay.muffin.CB.worlg4.BASESFeTDTL McKay.2020.BioFPR.default.SCEN.3PD 3000 McKay.2020.BioFPR.default.SPIN 

nohup ./runmuffin.sh McKay.muffin.CB.worlg4.BASESFeTDTL McKay.2020.BioFPR.default.SCEN.4p5 3000 McKay.2020.BioFPR.default.SPIN 

nohup ./runmuffin.sh McKay.muffin.CB.worlg4.BASESFeTDTL McKay.2020.BioFPR.default.SCEN.6p0 3000 McKay.2020.BioFPR.default.SPIN 

nohup ./runmuffin.sh McKay.muffin.CB.worlg4.BASESFeTDTL McKay.2020.BioFPR.default.SCEN.8p5 3000 McKay.2020.BioFPR.default.SPIN 

# BioTDR

nohup ./runmuffin.sh McKay.muffin.CB.worlg4.BASESFeTDTL McKay.2020.BioTDR.default.SCEN.3PD 3000 McKay.2020.BioTDR.default.SPIN 

nohup ./runmuffin.sh McKay.muffin.CB.worlg4.BASESFeTDTL McKay.2020.BioTDR.default.SCEN.4p5 3000 McKay.2020.BioTDR.default.SPIN 

nohup ./runmuffin.sh McKay.muffin.CB.worlg4.BASESFeTDTL McKay.2020.BioTDR.default.SCEN.6p0 3000 McKay.2020.BioTDR.default.SPIN 

nohup ./runmuffin.sh McKay.muffin.CB.worlg4.BASESFeTDTL McKay.2020.BioTDR.default.SCEN.8p5 3000 McKay.2020.BioTDR.default.SPIN 

# EcoFPR

nohup ./runmuffin.sh McKay.muffin.CBE.worlg4.BASESFeTDTL McKay.2020.EcoFPR.default.SCEN.3PD 3000 McKay.2020.EcoFPR.default.SPIN 

nohup ./runmuffin.sh McKay.muffin.CBE.worlg4.BASESFeTDTL McKay.2020.EcoFPR.default.SCEN.4p5 3000 McKay.2020.EcoFPR.default.SPIN 

nohup ./runmuffin.sh McKay.muffin.CBE.worlg4.BASESFeTDTL McKay.2020.EcoFPR.default.SCEN.6p0 3000 McKay.2020.EcoFPR.default.SPIN 

nohup ./runmuffin.sh McKay.muffin.CBE.worlg4.BASESFeTDTL McKay.2020.EcoFPR.default.SCEN.8p5 3000 McKay.2020.EcoFPR.default.SPIN 

# EcoTDR

nohup ./runmuffin.sh McKay.muffin.CBE.worlg4.BASESFeTDTL McKay.2020.EcoTDR.default.SCEN.3PD 3000 McKay.2020.EcoTDR.default.SPIN 

nohup ./runmuffin.sh McKay.muffin.CBE.worlg4.BASESFeTDTL McKay.2020.EcoTDR.default.SCEN.4p5 3000 McKay.2020.EcoTDR.default.SPIN 

nohup ./runmuffin.sh McKay.muffin.CBE.worlg4.BASESFeTDTL McKay.2020.EcoTDR.default.SCEN.6p0 3000 McKay.2020.EcoTDR.default.SPIN 

nohup ./runmuffin.sh McKay.muffin.CBE.worlg4.BASESFeTDTL McKay.2020.EcoTDR.default.SCEN.8p5 3000 McKay.2020.EcoTDR.default.SPIN 
