# Supplementary material for: Resolving ecological feedbacks on the ocean carbon sink in Earth system models
Source: Copernicus journal article supplement (doi:10.5194/esd-12-797-2021), 2021-07-14
Supplement: Supplementary file 1 [file esd-12-797-2021-supplement.zip › esd-12-797-2021-supplement-title-page.pdf]

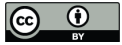

*Supplement of*

## **Resolving ecological feedbacks on the ocean carbon sink in Earth system models**

**David I. Armstrong McKay et al.**

*Correspondence to:* David I. Armstrong McKay ([david.armstrongmckay@su.se](mailto:david.armstrongmckay@su.se))

- [esd-12-797-2021-supplement-title-page.pdf](#)
- ESD ecoGENIE supp. material
  - ESD - McKay et al 2020 - Proofs Update - Supplement.pdf
  - cGENIE.muffin files
    - \* base.config
    - \* experiments
    - \* forcings
    - \* muffin\_commands.txt
    - \* spin-up restarts

The copyright of individual parts of the supplement might differ from the article licence.
